# Spatial structure of natural boxwood and the invasive box tree moth can promote coexistence.

Léo Ledru<sup>1</sup>, Jimmy Garnier<sup>2</sup>, Christiane Gallet<sup>1</sup>, Camille Noûs<sup>3</sup>, Sébastien Ibanez<sup>1</sup>

<sup>1</sup>Univ. Grenoble Alpes, Univ. Savoie Mont Blanc, CNRS, LECA, 38000 Grenoble, France

<sup>2</sup>Univ. Savoie Mont Blanc, CNRS, LAMA, 73370 Le Bourget-du-Lac, France

<sup>3</sup>Laboratory Cogitamus

Addresses for correspondance: LL: [leo.ledru@univ-smb.fr](mailto:leo.ledru@univ-smb.fr), JG: [jimmy.garnier@univ-smb.fr](mailto:jimmy.garnier@univ-smb.fr), CG: [christiane.gallet@univ-smb.fr](mailto:christiane.gallet@univ-smb.fr), CN: [camille.nous@cogitamus.fr](mailto:camille.nous@cogitamus.fr), SI: [sebastien.ibanez@univ-smb.fr](mailto:sebastien.ibanez@univ-smb.fr),

## 1 Abstract

2 In the absence of top-down and bottom-up controls, herbivores eventually exhaust their host plants driving them-  
3 selves to extinction. Poorly mobile herbivores may nevertheless go extinct only locally; then recolonize intact plant  
4 patches elsewhere, leaving time to previously over-exploited patches to regrow. However most herbivores such as  
5 winged insects are highly mobile, which may prevent the formation of spatial heterogeneity.

6 We test if long-distance dispersal can preclude coexistence using the invasion of box tree moth (*Cydalima*  
7 *perspectalis*) in Europe as a model system. We build a lattice model and estimate the parameters with a combination  
8 of field measurements, experimental data and literature sources. Space corresponds either to a realistic boxwood  
9 landscape in the Alps, or to theoretical landscapes of various sizes.

10 We find that both species persist under a large range of realistic parameter values, despite a severe reduction  
11 in boxwood biomass, with an alternation of outbreaks and near-to-extinction moth densities. Large landscapes  
12 are necessary for coexistence, allowing the formation of spatial structure. Low plant regrowth combined with  
13 long-distance dispersal could drive moths to extinction, because of resources depletion at the global scale even  
14 without a complete synchronization of the local dynamics. The spatial dynamics leads to formation of small plant  
15 patches evenly distributed in the landscape, because of a combination of local plant dispersal and global indirect  
16 competition between plants through their positive effect on moth population size. Coexistence is favored by such  
17 heterogeneous landscapes, because empty patches increase moth mortality during dispersal: the system thus creates  
18 its own stability conditions.

19 **Key words:** source-sink dynamics, green world, spatial asynchrony, metacommunity, invasive species

20

---

Author contributions : CG, SI and JG originally formulated the idea, CG, SI, JG and LL developed methodology, LL conducted fieldwork, SI, JG and LL developed the mathematical model, LL performed the numerical analyses, all authors participated in writing the manuscript.

## 21 Introduction

22 In general, most herbivores do not polish their resources off because they are top-down controlled by their predators  
23 [Hairston et al., 1960] as well as bottom-up limited by the defense compounds and the poor nutritional quality of  
24 plants [Polis, 1999]. However, in some cases such top-down and bottom-up mechanisms are insufficient, turning the  
25 green world brown. In such cases, it has been suggested that the spatial dynamics of plant-herbivore metacom-  
26 munities may favor their coexistence [Wilkinson and Sherratt, 2016]. This hypothesis builds upon long-standing  
27 theoretical work which has shown that spatial structure promotes the persistence of otherwise unstable prey-predator  
28 systems [Hassell et al., 1991, Comins and Hassell, 1996, Amarasekare, 2008], thanks to local extinctions followed  
29 by recolonization, in line with metapopulation and metacommunity dynamics [Hanski and Gilpin, 1997, Holyoak  
30 et al., 2005]. These theoretical predictions have received robust empirical support by experiments based on animal  
31 prey-predator system [Taylor, 1991], as protists [Holyoak and Lawler, 1996, Fox et al., 2017] and field studies with  
32 arthropods [Nachman, 1988, Winder et al., 2001].

33 However, there is little evidence showing that the spatial dynamics resulting from interactions between plants  
34 and herbivores leads to a green world - or at least to a multi-coloured world with green and brown patches. Many  
35 herbivorous insect populations persist thanks to metapopulation dynamics [Tschamntke and Brandl, 2004], but this  
36 is generally due to other mechanisms than the depletion of their plant resources. For instance, local extinctions  
37 can depend on patch size [Eber and Brandl, 1996], on the fluctuation of plant resources (but for other reasons than  
38 the herbivore itself [Halley and Dempster, 1996]), or on a combination of ecological succession and catastrophic  
39 events [Stelter et al., 1997]. In the well studied ragwort / cinnabar moth system, the moth can go locally extinct  
40 following defoliation, but plant patches persist [Myers and Campbell, 1976, Myers, 1976]. Although cinnabar moths  
41 contribute to local plant extinction, local plant persistence ultimately depends on habitat suitability, which leads to  
42 a source-sink dynamics rather than to a classical metapopulation scenario [van der Meijden and van der Veen-van,  
43 1997, Van der Meijden, 1979]. Moreover, the high dispersal ability of cinnabar moths prevents asynchronous local  
44 dynamics for the moth, which rules out a metapopulation model of coexistence [Harrison et al., 1995, van der Meijden  
45 and van der Veen-van, 1997]. As far as we know, the only documented plant-herbivore system where the plant  
46 goes locally extinct due to over-exploitation comprises the Apiaceae *Aciphylla dieffenbachii* and the monophagous  
47 weevil *Hadramphus spinipennis*, two species endemic to the Chatham Islands (New Zealand). Increased local weevil  
48 densities are associated with local plant extinction [Schöps, 2002], and numerical simulations have shown that spatial  
49 structure allows the persistence of the system, provided that the dispersal distance of the herbivore is intermediate  
50 [Johst and Schöps, 2003]. However, the ecological conditions which promote the persistence of this particular study  
51 system may not hold for other plant-herbivore interactions. In particular, the weevil *H. spinipennis* is wingless and  
52 of a large size, which considerably reduces its dispersal ability either by itself, by wind or by birds. In contrast, many  
53 insects can disperse at long distances [Wilson and Thomas, 2002, Gillespie et al., 2012]. Long-distance dispersal  
54 can promote metapopulation persistence, except when strong density dependence triggers local extinctions [Johst  
55 et al., 2002]. In that case, long-distance dispersal events synchronize local extinctions which eventually lead to  
56 the extinction of the whole metapopulation [Palmqvist and Lundberg, 1998, Johst et al., 2002]. In plant-herbivore  
57 metacommunities, strong density dependence occurs when herbivores overexploit their host down to local extinction.

58 In order to test if plant-herbivore metacommunities can persist despite high abilities of herbivores to disperse,

59 we study the system formed by the common European boxwood *Buxus sempervirens* and the invasive box tree  
60 moth (*Cydalima perspectalis*) in Europe. The moth first arrived in Germany in 2006/2007 [Van der Straten and  
61 Muus, 2010] via the boxwood trade from Asia [Kenis et al., 2013, Van der Straten and Muus, 2010, Bras et al.,  
62 2019]. It is currently quickly spreading throughout Europe [Blackburn et al., 2011], which suggests human and/or  
63 natural long-distance dispersal. On the base of its climate envelope, the moth will likely invade most of Europe  
64 in the following years [Nacambo et al., 2014], with potentially major ecosystemic consequences [Mitchell et al.,  
65 2018]. Defoliation caused by the moth can lead to the death of the boxwood, especially when the bark is also  
66 consumed [Kenis et al., 2013]. After total defoliation, boxwood can either grow back or wither completely, if the  
67 defoliation becomes too recurrent [Kenis et al., 2013]. The local extinction of boxwood has already been observed in  
68 the Nature Reserve of Grenzach-Whylen in Germany [Kenis et al., 2013]. In the meantime, the moth goes extinct  
69 locally after total defoliation of boxwood stand, even if it grows back several years after the moth outbreak. Within  
70 its area of origin, the moth is regulated by its natural enemies [Wan et al., 2014] and no local extinction of either  
71 plant and insect species is observed, but potential european natural enemies do not significantly alter the invasive  
72 moth dynamics [Kenis et al., 2013, Leuthardt and Baur, 2013]. Moreover, although box trees contain highly toxic  
73 alkaloids [Ahmed et al., 1988, Loru et al., 2000, Devkota et al., 2008], the moth larvae can sequester them in their  
74 body [Leuthardt et al., 2013], which may rule out bottom-up control. In contrast, in the ragwort / cinnabar and  
75 Apiaceae / weevil systems mentioned earlier, both insects are native and may therefore be top-down controlled by  
76 local natural enemies. Given that both top-down and bottom-up controls are disabled in the case of the invasive  
77 boxwood moth, will the European boxwood stands remain green?

78 Metacommunity dynamics with local moth extinctions followed by recolonization may be an alternative mech-  
79 anism to top-down and bottom-up control favouring coexistence in Europe. In the particular context of biological  
80 invasions, spatial effects have not been widely addressed [Melbourne et al., 2007], although they may favour coex-  
81 istence. The metacommunity mechanism requires spatial heterogeneity among local communities, which is likely  
82 because boxwood has a fairly fragmented distribution in Europe, and because the box tree moth was not simultane-  
83 ously introduced in every patch. As long as the invasion does not start simultaneously in all stands, the moth may  
84 disperse from its current totally defoliated stand to a green intact stand. The defoliated stands may then grow back  
85 and be recolonised lately. Thus, despite local extinctions and recolonizations, local fluctuations may be averaged on  
86 a large spatial scale, leading to a global stationary regime which has been called 'statistical stability' [De Roos et al.,  
87 1991, Holyoak et al., 2005, Amarasekare, 2008]. However, unlike the wingless weevil *H. spinipennis*, *C. perspectalis*  
88 is highly mobile, because it can fly or it can be transported by exogenous factors (wind, human activities) [Bras  
89 et al., 2019]. Its high mobility may prevent spatial heterogeneity and therefore precludes coexistence by spatial  
90 effects [Johst et al., 2002, Johst and Schöps, 2003]. Thus at large spatial scale, three ecological scenarios are likely  
91 to occur. First, the moth might very quickly overexploit its host, causing it own extinction but not the one of its  
92 host, which in turn slowly grows back. Second, the moth might persist long enough to exhaust its host, leading  
93 to the extinction of both species. Third, coexistence might result from the balance between local moth extinctions  
94 and recolonizations, without complete resource depletion. Our study focuses on the conditions which favor such  
95 coexistence, based on the following hypotheses :

- 96 1. Long-term coexistence of boxwood and moth is possible at the landscape scale through spatial stabilizing  
97 effects (1a). Those effects rely on asynchronous local dynamics (1b).

- 98 2. Despite cycles of local extinctions and recolonizations, the coexistence regime is stationary at the regional  
99 scale, which corresponds to statistical stability.
- 100 3. Dispersal is double-edged : very limited dispersal might prevent the colonization of green patches (3a), whereas  
101 long-distance dispersal may synchronize local dynamics (3b).
- 102 4. The coexistence regime depends on the landscape characteristics, in particular the landscape size and the  
103 proportion of boxwood patches in the landscape. First, larger landscapes favor coexistence (4a). Secondly,  
104 the effect of the proportion of boxwood patches is uncertain, since it provides more resources to the moth,  
105 but also favors outbreaks and resource depletion (4b).

106 In order to address these four hypotheses, we develop a population model dynamics for the boxwood and moth  
107 system. First, a local model reproduces the local invasion dynamics, which invariably leads to moth extinction  
108 in the field. Then, a spatially explicit model simulates the dynamics of the moth in a landscape. Our model is  
109 calibrated from the literature, *in situ* measures, and through mesocosm experimentation.

## 110 Study system & theoretical model description

### 111 Species involved : boxwood and box tree moth

112 The box tree moth, *Cydalima perspectalis*, is an herbivorous lepidoptera belonging to the Crambidae family [Mally  
113 and Nuss, 2010]. Five to seven stages of development are necessary to the larvae to become nymphs for about ten  
114 days before emerging as moths [Kawazu et al., 2010]. During the winter, the larvae are at the beginning of their  
115 development in stages two or three and form cocoons to enter in diapause [Nacambo et al., 2014]. The moths live  
116 for two weeks during which they reproduce and lay eggs on boxwood leaves. The moth has a high fecundity rate,  
117 with between 300 and 400 eggs laid per female [Kawazu et al., 2010, Wan et al., 2014]. In Asia, two to five life  
118 cycles are possible per year, with a break during the winter when the caterpillars are dormant [Maruyama et al.,  
119 1987, 1991]. In its invasion range, the moth completes from 2 (in the north) to 4 (in the south) generations per year  
120 [Nacambo et al., 2014, Göttig, 2017]. The mean intrinsic dispersal distance of moths has been estimated around  
121 ten kilometers per year [Van der Straten and Muus, 2010].

122 The moth exhibits no preference for any particular boxwood species [Leuthardt and Baur, 2013], so the common  
123 European boxwood *Buxus sempervirens* is widely consumed, as well as Caucasus boxwood *Buxus colchica*, and even  
124 the rarer European species *Buxus balearica* [Kenis et al., 2013]. These natural boxwood stands, which have already  
125 undergone a major decline over the last millennia [Di Domenico et al., 2012], are now subject to this additional  
126 threat. In Asia, *C.perspectalis* also consumes other species, including holly (*Ilex purpurea*), charcoal (*Euonymus*  
127 *japonicus*, and *E.alatus*). Fortunately this is not currently the case in Europe [Göttig, 2017]. Despite natural  
128 regulation by native predators and parasites, this moth remains a threat to ornamental boxwood in Asia, where  
129 its potential targets are protected by insecticides [Wan et al., 2014]. Instead, in Europe *Bacillus thuringiensis* is  
130 commonly used as a sustainable control method. However, its efficiency is offset by its low persistence; current  
131 efforts are being made to develop more long-term treatments. Biological control solutions are also being explored,  
132 such as the use of nematodes [Göttig and Herz, 2018] and parasites from the genus *Trichogramma* [Göttig and Herz,  
133 2016]. Efforts are also being made to seek out predators and parasites from the box tree moth's area of origin that

134 might act in areas of invasion [Göttig, 2017]. The use of pheromone traps is widespread, both for monitoring and  
135 control [Santi et al., 2015, Göttig and Herz, 2017], but their effectiveness appears to be insufficient at a large scale.  
136 Even if effective control for ornamental boxwood could be introduced, natural boxwood and associated ecosystems  
137 will likely suffer dramatically from the *C.perspectalis* invasion.

138 Boxwood has a fairly heterogeneous distribution in Europe that consists mainly of small and fragmented stands,  
139 but some large areas of continuous boxwood occur in the French Pyrenees, the Pre-Alps and the Jura [Di Domenico  
140 et al., 2012]. It is a long-lived, slow-growing shrub that thrives on calcareous substrate. It can tolerate a wide  
141 gradient of light incidence, and can therefore be found in a range of plant communities, from canopy areas in heaths  
142 to under cover in forests [Di Domenico et al., 2012]. It can play an important role in structuring ecosystems, by  
143 trapping sediment and storing water. It also influences the establishment and survival of tree species in wood-  
144 land succession [Mitchell et al., 2018]. A total of 286 species are associated with the shrub, including 43 fungi that  
145 are exclusively observed on boxwood [Mitchell et al., 2018]. However, boxwood is scarcely predated by native species.  
146

## 147 Demographic model on the local scale

148 Our model projects the population size  $m$  of Box Tree Moths (BTM) and the population density of Box Trees  
149 (BT), which are separated in two variables : leaf density  $l$  and wood density  $w$ , from moth generation  $n$  to  $n + 1$ .  
150 This time representation is used to avoid the problem of multiple generations per year and its variation with space  
151 location. However, we are able to project the population of BTM and BT from year to year if we know the number  
152 of generations per year in each specific location. We write

$$\begin{cases} l_{n+1} &= S_l(\mu_n) F_l(l_n) l_n + r_0 w_n \\ w_{n+1} &= S_w(\mu_n, \rho_n) F_w(w_n, \rho_n) w_n \\ m_{n+1} &= S_m(\mu_n) F_m m_n \end{cases} \quad (1)$$

153 to indicate that during the projection interval, BT and BTM grow and reproduce (F), and survive (S). The BT  
154 reproduction functions were constructed using a Ricker model, which includes the intrinsic population growth rates  
155  $r_f, r_w$  and the carrying capacity of the environment  $L_{max}, W_{max}$ , while the BTM reproduction function is linear  
156 and only includes the fecundity of adults  $f$  and their survival  $s$ . The survival of the species is determined by the  
157 consumption of leaves and bark by the BTM as well as the intraspecific competition for the resource faced by  
158 BTM. The survival and reproduction functions  $F$  and  $S$  depend on both the current population  $l, w, m$ , and the  
159 environmental descriptors  $\mu$  and  $\rho$ .

160 **Environmental descriptors.** The environmental quality is described using two descriptors  $\mu$  and  $\rho$  defined  
161 by ratios of population densities:

$$\mu_n = \frac{f m_n \alpha}{l_n} \quad \text{and} \quad \rho_n = \frac{l_n}{w_n}$$

162 The ratio  $\mu$  corresponds to the ratio between the number of leaves needed by all the larvae to fulfil their cycle and  
163 the number of available leaves ( $\alpha$  is the amount of leaves needed per larva). The number of larvae depends on the  
164 number of moths ( $m_n$ ) through its product by the moth fecundity ( $f$ ). And each larva needs  $\alpha$  leaves to complete

165 its cycle. The ratio  $\mu$  thus quantifies the pressure for the resource, which plays a direct role in the intensity of  
 166 consumption of leaves and wood, and therefore the survival of the larvae.

167 The ratio  $\rho$  is the quantity of leaves per unit of wood. This represents the level of boxwood defoliation, which has  
 168 an impact on the growth of the wood.

169 **Reproduction.** The increase in foliage biomass is the result of two processes: the growth of leaves  $F_l$ , which  
 170 depends on the current foliage (Figure 1a), and the production  $r_0$  of new shoots by the wood after defoliation  
 171 (Figure 1b). Without herbivory, the growth of leaves is limited only by senescence and carrying capacity  $L_{max}$ .  
 172 Thus, growth  $F_l$  is represented by a Ricker model in the following form

$$F_l(l) = \exp\left(r_f\left(1 - \frac{l}{L_{max}}\right)\right)$$

173 where  $r_f$  is the intrinsic growth rate of the leaves.

174 The wood growth function  $F_w$  (Figure 1c) is constructed using a Ricker model. Positive growth ( $r_w > 0$ ) is  
 175 constrained by carrying capacity. Negative growth ( $r_w \leq 0$ ) occurs after an important defoliation because branches  
 176 or even a proportion of trunk can die after defoliation. For each projection interval  $n$ , the intrinsic growth rate of  
 177 the wood  $r_w(\rho_n)$  is defined as the balance between the production of new wood  $b_w$ , which critically depends on the  
 178 density of leaves per unit of wood  $\rho_n$ , and the mortality induced by severe defoliation  $d_w$ .

$$179 \quad F_w(w, \rho) = \begin{cases} \exp(r_w(\rho)(1 - \frac{w}{W_{max}})) & \text{if } r_w(\rho) > 0 \\ \exp(r_w(\rho)) & \text{if } r_w(\rho) \leq 0 \end{cases} \quad \text{with } r_w(\rho) = b_w(\rho) - d_w(\rho)$$

180 When the density of leaves is large ( $\rho \gg 1$ ), the BT is healthy and its production of wood reaches a maximum  
 181  $r_{w,max}$ . Conversely, when the density of leaves per unit of wood collapses due to severe defoliation, the production  
 182 of wood is low while the mortality increases until a maximum  $-r_{w,min} < 0$  which forces the growth rate to be  
 183 negative. The production function  $b_w$  and the mortality function  $d_w$  takes the following form :

$$b_w(\rho) = \frac{\rho^{\beta_r}}{\rho^{\beta_r} + \theta_r^{\beta_r}} r_{w,max} \quad d_w(\rho) = (1 - d^{\frac{1}{\rho}}) r_{w,min} \quad (2)$$

184 where  $\beta_r$ ,  $\theta_r$  and  $d$  are shape parameters (see Table 1).

185

186 The reproduction rate of BTM (Figure 1d) does not suffer from density dependence and is equal to the product of  
 187 adult fecundity  $f$  and adult survival  $s$

$$F_m = f s$$

188 **Survival.** The leaves may die by senescence at rate  $v$ , or be consumed by BTM at a rate which increases with  
 189 the pressure of BTM on BT,  $\mu$ , (Figure 1e). In the absence of BTM, 0% of leaves are consumed, while if BTM have  
 190 saturated the environment, 100% of the leaves are consumed. Thus the survival function of the leaves is defined by

$$S_l(\mu) = v(\sigma_l^\mu) \quad (3)$$

191 where  $\sigma_l$  is a shape parameter (see Table 1).

192

193 The wood can suffer from both defoliation (Figure 1c), which decreases its intrinsic growth rate, and from the  
194 consumption of bark by the BTM (Figure 1f).

195 The wood mortality due to consumption increases with both the BTM pressure,  $\mu$  and the BT health  $\rho$ . More  
196 precisely, the wood mortality saturates to  $d_{max}$  when the foliage is abundant (large ratio  $\rho \geq 1/3$ ). However, when  
197 the foliage is small (low ratio  $\rho \leq 1/3$ ), the bark consumption occurs while the superficial woods is available. Thus  
198 recently defoliated boxwood with small bark coverage ( $\rho$  close to 0) cannot be consumed by the larvae.

$$S_w(\mu, \rho) = 1 - \frac{\mu^{\beta_s}}{\mu^{\beta_s} + \theta_s^{\beta_s}} D_{max}(\rho) \quad (4)$$

199 where  $\beta_s$  and  $\theta_s$  are shape parameters and  $D_{max}$  is the maximal mortality rate which grows linearly with  $\rho$  until a  
200 threshold  $1/3$ , at which point it saturates to its critical value  $d_{max}$ .

$$D_{max}(\rho) = \begin{cases} 3d_{max} \rho & \text{if } \rho < 1/3 \\ d_{max} & \text{if } \rho \geq 1/3 \end{cases} \quad (5)$$

201 This step function takes into account that the consumption of superficial wood depends on the presence of available  
202 softwood, and thus a certain amount of foliage. The threshold value  $1/3$  for BTM pressure  $\rho$  corresponds to the  
203 approximate ratio when there is as much foliage as wood, the density of the wood being three times greater.

204

205 Survival of BTM during the larval stage depends mainly on the amount of available resource per larva  $\mu$ . If the larva  
206 has enough available resource to complete its six stages, it will evolve into a moth, while a lack of resource during its  
207 growth will cause its death. The survival rate also takes into account intraspecific competition for resource caused  
208 by interference between the larvae. The survival function is defined using a shape parameter  $\sigma_m$  as

$$S_m(\mu) = \begin{cases} S_{m,max} \left(1 - (\sigma_m)^{\frac{1}{\mu}}\right) & \text{if } \mu < 2 \\ 0 & \text{if } \mu > 2 \end{cases} \quad (6)$$

209 The threshold  $\mu = 2$  fits a given situation that occurs when there is a shortage of resource for the larvae, even if  
210 some larvae die during their evolution.

## 211 Spatially explicit model

212 The local model allows us to describe the interaction between BTM and its host BT at a small homogeneous spatial  
213 scale. Next, we build a cellular automaton in order to investigate the BTM invasion over a regional heterogeneous  
214 landscape. From field observations provided by the National Alpine Botanical Conservatory, we obtain a map of  
215 the French Alps composed of 570 by 351 cells of 29 hectares each (about 58 000km<sup>2</sup>, see Online Resource 1 in  
216 Supporting Information). It should be noted that these data focus on natural boxwood and neglect the presence of  
217 ornamental boxwood in urban areas. We focus on the French Alps because detailed botanical data are available,



218 but in theory our model could be extended to the whole area of invasion. Green cells correspond to areas with  
219 BT, grey cells correspond to areas without BT, while blue cells represent urban areas. We use the basemap from  
220 OpenStreetMap based in Qgis<sup>®</sup>. In each cell with BT, BTM can mate and lay eggs according to the local model,  
221 while in cells without BT, BTM cannot become established. After the reproduction phase, BTM moths disperse  
222 over the landscape to find new areas to breed and lay eggs. BT can also disperse over the landscape to recolonise  
223 extinct areas. Simulations are initialized with a single moth invading a patch chosen at random, and carried out on  
224 a maximum of 1000 iterations if no specifications are given.

225 **Dispersal phase of BTM.** A BTM dispersal event includes two stages: (1) emigrating from birth areas, and  
226 (2) searching for new areas (exploration) and settling to breed. Field observations suggest that the exploration  
227 phase is stochastic, composed of frequent short-distance dispersal by adult flight, and rare long-distance dispersal  
228 by anthropogenic action (boxwood trade) or long flight. *In situ* experimentation using a flight carousel has provided  
229 a mean dispersal distance per individual of 13km (Bras et al., personal communication), which is in accordance  
230 with the 10km dispersal distance observed by Van der Straten and Muus [2010]. Bras et al. have also observed rare  
231 long-distance flights in their experiments, which may correspond to long-distance dispersal events that we model  
232 using a fat-tailed dispersal kernel. To this end, we use an exponential power distribution from Klein et al. [2006]  
233 which makes it possible to compare different shape of distribution tails while maintaining a fixed average dispersal  
234 distance. For ecologically realistic calibration the tail shape parameter is 0.5 (i.e fat-tailed dispersal kernel) and  
235 the average dispersal distance is 25 cells (i.e  $\approx 13$ km). In addition, to save computation time, we assume that  
236 BTM disperses as a swarm of 1000 individuals. This group dispersal may occur because BTM can be attracted by  
237 volatile boxwood compounds or avoid geographical barriers, or are influenced by weather conditions. Thus, during  
238 the searching and settling phase, each group of BTM settles in an area located at a random distance drawn in the  
239 exponential power distribution and chosen with a random turning angle run in a uniform distribution over  $(0, 2\pi)$ .  
240 The emigration rate for each location depends on the pressure for resource  $\mu$  at the birth location. As long as  
241 pressure remains low, the moths have the possibility to find leaves to oviposit in their birth patch and thus dispersal  
242 is weak. When the resource pressure increases, there is not enough boxwood available for laying eggs and adults  
243 will disperse massively to another patch in search for resource. Such resource-dependent dispersal has also been  
244 modelled by the study of Johst and Schöps [2003]. The migration rate  $M_m$  of BTM depends on  $\mu$  as follows

$$M_m(\mu) = (1 - \delta^\mu)M_{m,max} \quad (7)$$

245 where the maximal dispersal rate  $M_{m,max}$  takes into account mortality during the dispersal. Thus the number of  
246 dispersal events at each location is given by  $\frac{M_m(\mu)m}{1000}$ .

247

248 **Dispersal of BT.** Dispersal events for BT include (1) creation of seeds and (2) dispersal of seeds to surrounding  
249 areas by wind and birds. We assume that BT dispersal is very low and occurs only if the boxwood is in fairly good  
250 condition, meaning that it has sufficient foliage. Thus the dispersal rate of BT depends on the foliage ratio per BT,



251  $\rho$

$$M_w(\rho) = \begin{cases} (\omega_w)^{1/\rho} M_{w,max} & \text{if } \rho > 1/3 \\ 0 & \text{otherwise} \end{cases} \quad (8)$$

252 As such, the initial density of wood in a newly dispersed seedling depends on the parent patch density. Foliage  
253 is produced in the next generation after recolonization through the production of leaves by the wood ( $r_0 w_n$  in  
254 equation (1)). We assume that seeds from a location are transported randomly only in the 8 surrounding cells that  
255 has previously contained BT. We only make it possible for an extinct area to be recolonized by surrounding BT,  
256 and we make it impossible for BT to colonize new areas.

## 257 Theoretical landscape

258 To investigate the effect of the spatial structure we run our model on a square landscape with various initial size  
259 and proportion of boxwood patches. For each landscape, we also calculate an aggregation index by counting the  
260 number of pairs (adjacent boxwood patches) in the landscape and dividing it by the maximum number of possible  
261 pairs:  $2n - |2\sqrt{n}|$ , where  $n$  is the proportion of boxwood cells [Harary and Harborth, 1976]. For each landscape size  
262 and boxwood proportion, we randomly generate 1000 landscapes with possibly different aggregation indices. The  
263 final aggregation index equals the difference between the index of the landscape of interest and the average index  
264 of the randomly generated landscapes.

265 Cluster detection is done using the function Matlab<sup>®</sup> FINDCLU from the File Exchange of MathWorks. To fit the  
266 power-law to the cluster-size distribution, we define size-classes of five cells and evaluate the number of clusters in  
267 each class.

## 268 Parameter estimation

269 We use three measurement methods to calibrate the model parameters: 1) field measurements, 2) literature review,  
270 3) mesocosm experiment. Some unmeasured parameters are estimated in order to obtain coherence between the  
271 simulations, the observations in the field, and the literature.

272

### 273 Fecundity parameter $f$

274 Females lay about 300-400 eggs at a time [Kawazu et al., 2010, Wan et al., 2014]. However, the model does not  
275 separate males from females, and survival is calculated for caterpillars but not for eggs. The sex ratio seems signif-  
276 icantly skewed in favor of males, with only  $43\% \pm 10\%$  of the population being females, according to Götting [2017].  
277 The hatchability rate is about  $79.7\% \pm 2\%$  according to Kawazu et al. [2010]. The fertility parameter is therefore  
278 estimated with these bibliographic data using the value:  $f = \text{number of eggs} * \text{percentage of female} * \text{hatchability}$   
279  $\text{rate} = 120$ , with a range from 0 (i.e effects of oophagus predators and parasites) to 300.

280

### 281 Box tree moth survival function and wood consumption function

282 To determine the survival function according to the pressure for resource  $\mu$ , the maximum caterpillar survival  
283  $S_{m,max}$  is estimated using the bibliographic data. Through lab experimentation, Kawazu et al. [2010] have obtained  
284 the following parameters: a larvae survival rate of 78%, a pupation rate of 70%, and an emergence rate of 89%.

285 Thereby, we estimate  $S_{m,max} = 49\%$  which seems appropriate because in this laboratory experiment the caterpillars  
286 have not undergone any starvation stress. However, for this function, the second parameter  $\sigma_m$  also has to be set;  
287 this parameter is difficult to measure because it has no ecological interpretation. Nonetheless, it is possible to obtain  
288 different survival values for different  $\mu$  in order to make a qualitative adjustment of the survival curve. To do this,  
289 we performed a mesocosm experiment from April 4 to late May 2018, located on the University of Savoie Mont Blanc  
290 campus, in an isolated grassy area (45°38'30.0"N 5°52'02.7"E). Climatic conditions were close to those of nearby  
291 natural boxwood stands. We created a pressure range for the resource by placing varying numbers of caterpillars  
292 on the box trees. The range included seven  $\mu$  values, with four replicas for each and four controls. Each of the 32  
293 boxwood were isolated in cages of 1m<sup>3</sup> covered by mesh (insect proof netting PE 22:30, 920x920; DIATEX, Saint  
294 Genis Laval, France) to prevent movement of the larvae between the boxwood. All of the boxwood shrubs came  
295 from the same supplier and had received no chemical treatment. They measured 30 cm high and were cultivated in  
296 1 liter pots.

297 To establish the pressure range, we estimate the parameter  $\alpha$  corresponding to the amount of leaves needed by a  
298 moth for its larval cycle, for each value of  $\mu$ . [Slansky Jr and Scriber \[1982\]](#) provide a mean value of ingested food  
299 conversion efficiency (ECI) of 20% for herbivorous Lepidoptera. Knowing that  $ECI = B/I$  with B being gained mass  
300 and I being ingested food, we obtain I through measurements of dry caterpillar masses performed by T. Defferier and  
301 E. Tabone from the National Research Institute for Agriculture, Food and Environment (INRAE). Then, using the  
302 average dry mass of the leaves, we convert I into the number of leaves ( $I = 25$  leaves). Finally, the number of leaves  
303 was counted for each boxwood. Therefore, the value of simulated  $\mu$  could be determined when a certain number  
304 of caterpillars were deposited on a particular box tree. The range used was:  $\mu = [2; 1; 0.75; 0.5; 0.25; 0.13; 0.07]$  (see  
305 Online Resource 2).

306 This experimentation also make it possible to calibrate the leaf consumption function. At the end of the experiment,  
307 when the surviving larvae had reached the adult stage, we counted the living leaves on the boxwood in order to  
308 obtain the percentage of leaves that were consumed. The insect-free controls allowed us to distinguish between mor-  
309 tality caused by caterpillars and mortality due to the environment. The qualitative calibration of the consumption  
310 curve is thus established using the consumption percentages as a function of  $\mu$ .

311

### 312 **Wood mortality function**

313 Boxwood mortality by senescence is very low and some boxwood may be over 600 years old. However, box trees  
314 attacked by 2 or 3 successive generations may have high probabilities of death [[Kenis et al., 2013](#)]. It is necessary to  
315 calibrate mortality due to consumption of superficial wood by the late larva stage caterpillars,  $D_{max}$ , and notably  
316 the parameter  $d_{max}$ . Two wild boxwood locations are used to make *in situ* measurements. These boxwood areas are  
317 located on the eastern slope of the Epine massif in Savoie (45°38'23.7"N 5°50'43.6"E and 45°41'33.2"N 5°50'56.2"E)  
318 at an altitude of 500 and 630 meters, respectively. This massif has large stands of wild boxwood under trees in  
319 limestone soil. The peak invasion and defoliation of the boxwood occurred in July and August 2016, and mortality  
320 measurements were made in March 2017.

321 Mortality is assessed in terms of biomass rather than in terms of individuals, using the following procedure: the  
322 percentage of living biomass is measured on completely defoliated boxwood according to the level of branching  
323 (trunk or branch). For the trunk, the percentage of the total height of the boxwood with shoots ( $h$ ) is measured,

324 and for branches the percentage of branches with shoots ( $r$ ), is measured. The mortality  $d_{max}$  is estimated by:  
325  $d_{max} = 1 - \frac{h+r}{2}$ . The measurements made on 101 boxwoods give  $d_{max} = 0.74$ .

326

### 327 **Shoot production parameter**

328 The production of shoots from wood,  $r_0$ , is measured by estimating the biomass of shoots produced by wood whose  
329 1) live biomass is estimated and 2) defoliation date is known. First, the average mass of a shoot is measured from  
330 250 shoots. Then, for each measured boxwood ( $N = 49$ ), the living wood biomass is estimated by considering the  
331 trunk as a cone whose volume could be calculated using its circumference and height, with the same calculations  
332 made for the branches. This volume, multiply by the density of the wood ( $0.95g.cm^{-3}$ ), gave the biomass of living  
333 wood. We count number of shoots and are able to obtain the biomass of the shoots. Thus,  $r_0 = \frac{shoots\ biomass}{wood\ biomass} * \frac{1}{time}$   
334 with  $time$  being the number of generations since defoliation.

335 For the 49 boxwoods measured, the amount of new growth varies from 1 to 154 with an average of 45, giving  
336  $r_0 = 5 * 10^{-5}$ .

337

### 338 **Wood growth function**

339 Calibration of the growth function from empirical measurements is performed only for the maximum growth value  
340  $r_{w,max}$ . For this, a method of dendrometry is used. We have cut some trunk sections with different circumferences  
341 (1.5, 2.4, 3.8, 4, 4.9, 5.6, 7.8 centimeters), and we have counted their rings number (respectively 11, 15, 20, 25, 32,  
342 36, 50). We assume that boxwood is a cone whose increase in height is proportional to its increase in width, and  
343 its growth is proportional to its density. Thus we can infer the maximal growth rate per year  $r_{w,max} = 0.134$  using  
344 a linear regression. Thus, the growth per generation in the case of two generations of moth per year is 0.067. We  
345 obtain a low estimate because we consider that the growth of individuals is already occurring, but not the formation  
346 of new individuals while  $r_{w,max}$  takes it into account. From the simulation of the model in the absence of herbivory,  
347 and this experimental value,  $r_{w,max} = 0.3$  is used to model a consistent boxwood growth rate.

### 348 **Experimental results**

349 Two functions are calibrated according to the experiment: a function for the consumption of leaves by caterpillars  
350 (Figure 2a) and a function for caterpillar survival (Figure 2b). These two functions are dependent on competition  
351 for the resource through  $\mu$ . For the leaf consumption function, we quantify the mortality due to senescence from  
352 the difference between the average number of initial and final leaves in absence of moth pressure ( $\mu = 0$ ), and then  
353 deduct that from the initial number of leaves for each boxwood. This allows one to express in the results only the  
354 proportion of dead leaves due to the action of the caterpillars, but it implies the hypothesis that all boxwood suffer  
355 about the same mortality due to senescence. Therefore, the control box trees had 100% of non-consumed leaves.

356 Leaf consumption reaches a threshold for  $\mu = 1$ , i.e. when resources present and resources needed are similar, above  
357 which the entire resource is consumed. Similarly, it is the threshold at which survival reaches its lowest value and  
358 nearly stagnates. The results presented here show survival until the pupal stage, but at the end of the experiment  
359 no moths emerge in the box trees when  $\mu = 2$ , which is why the survival function is set to 0 for  $\mu = 2$ .

360 These results are remarkable because they are similar to those expected with a defoliation saturation threshold at  
361  $\mu = 1$  and a drastic drop in moth survival. They support our model and minimise the uncertainties that we may  
362 have on other parameters.

363

## 364 Local model

365 Field observations show that when the box tree moth colonizes a patch, its population explodes within a few  
366 generations, eventually reaching a peak of density which results in total defoliation of the boxwood stand. At this  
367 point no more resources are available and the box tree moth disappears from this patch. We estimate the remaining  
368 model parameters in order to reproduce this qualitative behaviour, and to achieve plausible quantitative outputs  
369 (these parameters are referred as "estimate" in Table 1).

370 Figure 3 simulates the invasion dynamics as expected. The boxwood (leaf and wood) starts at its carrying  
371 capacity, which is calculated from a simulation without moths, and a single box tree moth is added to the patch.  
372 Within six generations, the moth population reaches its peak abundance. During the 7th generation, the ratio  $\mu$   
373 between the number of leaves needed by the larvae and the available leaves becomes too large and the survival of  
374 the moth drops to 0. At this point, the effect on boxwood density is maximal. Leaves are entirely consumed by the  
375 early larval stages, which cannot reach their final stages and die from starvation. Still, leaf density does not reach  
376 0 because new leaves grow from wood (at rate  $r_0w$ ). In a more ecologically accurate representation, the density  
377 of the leaves would drop to 0 and then new leaves would only be produced in the next generation, but this would  
378 not change the model's outputs. Moreover, this phenomenon is implicitly present since all of the moths in the 7th  
379 generations die from starvation and cannot consume the new leaves produced, so it is comparable to a production of  
380 new leaves during the next generation. In natural conditions, however, intact boxwood patches will be more likely  
381 invaded by a larger number of moths. In the spatial version of the model, dispersal events occur with groups of  
382 1000 individuals due to volatile compounds or other exogeneous attractors, and in that case the peak is reached as  
383 early as the 4th generation, and the moth population crashes at the 5th generation.

384 Although the moth population collapses for realistic parameter values, with different parameters the model  
385 allows a positive equilibrium for the three state variables, i.e. the coexistence of moth and boxwood (wood and  
386 leaves). We therefore built map of the final model state in function of moth fecundity and moth survival, two  
387 key parameters which may vary during the course of the outbreak in Europe. The accommodation of native  
388 predators and parasites could indeed reduce the survival rate of caterpillars, and moth fecundity could be reduced  
389 by oophagous insects. The final state map (Online Resource 3) clearly shows that coexistence is only possible in  
390 a very narrow range of parameters values, which are far from the actual measured values. Two connected patches  
391 instead of one can sometimes be enough to favour coexistence in plant-insect interactions [Kang and Armbruster,  
392 2011], but simulations conducted on a two-patch model show only a slight expansion of the coexistence area, which  
393 is far from sufficient to lead to coexistence with realistic parameters (Online Resource 3).

## 394 Modelling results and discussion

### 395 Results for hypothesis 1

396 Using a spatially explicit model, including local population dynamics and short to long range dispersal events,  
397 we show that coexistence of the moth/boxwood system occurs across a wide range of parameters. At a regional

398 scale, dispersal allows box tree moth persistence in a cycle outbreak dynamic [Berryman, 1987], through recurrent  
399 recolonization of patches that have been previously defoliated and which have had time to recover. The spatial  
400 structure therefore allows coexistence, in line with hypothesis 1a. The coexistence mechanism is similar to the  
401 rock-paper-scissors game with the corresponding states: patches of defoliated box tree, patches of box tree with  
402 foliage and patches of box tree invaded by the moth. These three states compete with each other following a circular  
403 hierarchy, as defoliated box trees 'lose' against box trees with foliage, which are in turn invaded by box tree moths,  
404 which finally leads to defoliated box trees. Similar rock-paper-scissors games have been described in other ecological  
405 contexts such as polymorphic bacterial strains [Kerr et al., 2002] and plant-mutualist-exploiter systems [Szilágyi  
406 et al., 2009].

407 We also explore moth persistence over a larger range of fecundity and survival parameters than those estimated.  
408 Predation on the moth and on the caterpillars is currently low [Kenis et al., 2013], in part because the box tree  
409 moth accumulates boxwood alkaloids in its body [Leuthardt and Baur, 2013]. However, native predators may  
410 become efficient to feed on the moth following phenotypic plasticity or adaptation [Carlsson et al., 2009]. Native  
411 egg parasites like trichograms often used in biological control may also become able to feed on the moth, thereby  
412 reducing its fecundity. We find that the moth could rapidly go extinct only for very low fecundity and survival rates  
413 (lower-left corners of Figure 4a and f). It is therefore unlikely that the accommodation of native natural enemies  
414 will trigger moth extinction.

415 One step further, hypothesis 1b postulates that long-term coexistence is due to asynchronous dynamics, and  
416 that moth extinction is due to the synchronisation of the local dynamics. If we artificially ensure that the invasion  
417 begins with a moth in each cell, we observe that all boxwood stands are defoliated simultaneously and that the  
418 moth disappears globally in a dynamic of type pulse outbreak [Berryman, 1987]: perfect synchronization indeed  
419 leads to moth extinction. But if all stands are initially invaded except a single one, this is enough for the occurrence  
420 of desynchronisation, and the whole system becomes viable. The moth can therefore disappear due to perfect  
421 synchronization, with 100% of the patches invaded simultaneously. However, any other mechanism that globally  
422 reduces drastically the resources may also cause moth extinction. Indeed, with high moth fecundity and survival  
423 rates (upper-right corners of Figure 4a and f) the moth depletes the resource until its own extinction. In contrast to  
424 the results obtained with *H. spinipennis*-*A. dieffenbachii* system, our results indicate that global resource depletion  
425 is responsible for moth extinction, rather than synchronisation of local dynamics [Johst and Schöps, 2003]. This  
426 is in line with the individual-based model of Uchmański [2019], who found that forest insect pests may go extinct  
427 when adult fecundity or larvae survival increase. Within the coexistence regime, the average density of moths and  
428 the average intensity of the invasion are insensitive to moth fecundity and survival; the moth either persists at the  
429 coexistence density or goes extinct (Figure 4).

430 Interestingly, the moth population can persist even when it periodically invades 99% of the patches (Figure 5  
431 top), provided that leaves grow back fast enough to prevent global resource depletion. In this case the moth invades  
432 a significant proportion of the patches even during troughs (about 12%); the cyclic dynamics are therefore getting  
433 closer to a permanent outbreak [Berryman, 1987]. The same process occurred in the model of Uchmański [2019],  
434 where leaf growth rate was expressed by a parameter defining the number of years needed for their regeneration.  
435 In his model, when the leaf growth rate increased the dynamics of the cyclic outbreak was accelerated, with shorter  
436 periods between peaks and troughs. The system then transitioned to a permanent outbreak for very rapid leaf growth

437 rates. On the contrary, a slow leaf growth rate led to the extinction of the insects (Figure 5).

438

## 439 Results for hypothesis 2

440 We further postulate that, despite local cycles of extinction and recolonization, the coexistence regime is stationary  
441 at the landscape scale (hypothesis 2), a phenomenon called statistical stability [De Roos et al., 1991, Holyoak et al.,  
442 2005, Amarasekare, 2008]. Instead, we find that the coexistence regime is periodic at the landscape scale (Figure  
443 6a). A similar pattern has been observed in the *H. spinipennis*–*A. dieffenbachii* system [Johst and Schöps, 2003]  
444 and in Uchmański [2019]. The global period ranges between 20 generations (high leaf growth rate, Figure 5 top) and  
445 40 generations (low leaf growth rate, Figure 5 bottom). In contrast, the invasion of a local patch lasts 5 generations  
446 when 1000 moths are introduced at once, and 7 generations when a single moth colonizes the patch (Figure 3).  
447 This discrepancy between the local and global timescales suggests that periodicity at the global scale results from  
448 the combination of the local time scale and the pace of dispersal. During peaks, between 60 and 99% of the box-  
449 wood patches are simultaneously invaded by the moth, and 1-5% during periods of minimal abundance, depending  
450 on parameter values. This corresponds to periodic travelling waves, which have been described in prey-predator  
451 systems [Lambin et al., 1998, Sherratt, 2001]. However, such prey-predator systems are locally periodic as well,  
452 and long-term coexistence does not require spatial structure. In contrast, in our study system, the periodic waves  
453 emerge from the spatial structure, instead of being a mere consequence of local periodicity.  
454 If the mean dispersal distance is very low (1 cell on average, keeping rare long-distance events), the amplitude of  
455 the oscillations is also very low (Figure 7b) and the system tends to be statistically stable.

456

## 457 Results for hypothesis 3

458 Hypothesis 3 posits that asynchronous local dynamics require intermediate dispersal distance [Myers, 1976, Myers  
459 and Campbell, 1976], because very limited dispersal might prevent suitable boxwood patches from colonization (3a),  
460 whereas very long-distance dispersal may synchronize local dynamics (3b). However, with the measured parameter  
461 values we find that the long-term probability of moth persistence is insensitive to dispersal distance. This is shown  
462 in Figure 7a, where the measured value for the production of new leaves from wood after total defoliation  $r_0$  equals  
463  $5 * 10^{-3}$  (-2.3 on a log scale). In that case, the moths persist whatever the mean dispersal distance is (1, 25 or 70  
464 cells), because boxwood produces new shoots after total defoliation fast enough to enable moth persistence even  
465 when the global leaf biomass is low. Meanwhile, previously infected areas produce enough leaves to support another  
466 moth outbreak. Conversely, when  $r_0$  equals  $2 * 10^{-3}$  (-2.7 on a log scale, which may happen under climatic stress  
467 for instance), it turns out that the moth does not persist when the mean dispersal distance equals 70 cells (Figure  
468 6b). The moth initially invades 99% of the patches (Figure 6c) and reaches very high densities (Figure 6d). This  
469 reduces the global leaf biomass (Figure 6e) and the moth eventually collapses due to resource depletion. In the  
470 case of coexistence (Figure 6a) the maximal % of invaded patches is around 60-70%, the maximal moth density is  
471 3 times lower and the minimal leaf biomass is 5 times higher than in the extinction case.  
472 We also find that when the mean dispersal distance is very short (1 cell on average) the probability of moth

473 persistence is not affected by the offshoot production rate. Because of short-distance dispersal, the moth does not  
474 generate periods of global invasion and intact patches are always present at the border of its slow moving invasion  
475 front. In that case, relatively high offshoot production rates are unnecessary as the moth do not rely on the new  
476 growth of recently defoliated patches. In contrast, when the average dispersal distance is larger (e.g. 25 and 70  
477 cells), the probability of persistence increases with the offshoot production rate (Figure 7a). In such cases, the moth  
478 needs to recolonize recently defoliated patches because during peaks a large proportion of patches are defoliated at  
479 the same time. Therefore, relatively high offshoot production rates are necessary to avoid global over-exploitation.

480 The influence of the mean dispersal distance on moth persistence is therefore studied with a relatively low  
481 offshoot production rate,  $r_0 = 2 * 10^{-3}$ . As expected by hypothesis 3b, frequent long-distance dispersal events lead  
482 to the extinction of the moth due to global resource depletion (Figure 7b, continuous line). This effect of long-  
483 distance dispersal was not present in Uchmański [2019], this can be explained to the use of a thin-tailed Gaussian  
484 kernel characterized by very rare long-distance dispersal events, thus insect pests could not reach the distant trees  
485 which had time to regenerate after their last defoliation.

486 Furthermore, hypothesis 3a posits that the moth goes extinct in the case of limited dispersal, because it would  
487 not be able to escape over-exploited patches. However, the fat-tailed dispersal kernel prevents such phenomenon:  
488 even when the mean dispersal distance is very low (1 cell), the moth can persist thanks to frequent long-distance  
489 dispersal events. Things change when we constrain dispersal to a uniform distribution, which ranges between 1 cell  
490 and a given maximum of cells. In that case, when the maximum number of cells is low enough (up to 4 cells), the  
491 moth invasion can get stuck in a landscape dead end and it disappears because of local resource depletion, and not  
492 global resource depletion (Figure 7b, dotted line). Prey-predator systems subject to limit cycles was also stabilized  
493 by limited dispersal in the individual-based model of Cuddington and Yodzis [2000], where limited dispersal reduced  
494 the average predation rate and thereby avoided local instability. However, if dispersal is too limited the consumer  
495 can go extinct because of a drastic reduction in the rate of predation, as is the case in our model when long distance  
496 dispersal events are extremely rare due to uniform dispersal kernel (Figure 7b, dotted line).

497 The results obtained using the fat-tailed dispersal seems the most plausible, indeed rare long-distance dispersal  
498 events mediated either by wind or by human dispersal likely occur in the case of the box tree moth. With a fat-tailed  
499 dispersal kernel, multiple invasion fronts are created far away from invaded patches because long-distance dispersal  
500 events are frequent [Shaw, 1995]. This created a fragmented landscape of defoliated and intact boxwood, in which  
501 the moth does not end up in a dead end. Such a fragmented invasion front can be observed in Europe. The moth  
502 was first observed in Germany in 2006/2007; in the same year it spread to Switzerland and the Netherlands. It  
503 then spread to France [Feldtrauer et al., 2009] and the United Kingdom [Salisbury et al., 2012] in 2008, to Austria  
504 in 2009, to Italy [Bella, 2013] in 2010, and to Portugal, Iran and Armenia in 2016 [Bras et al., 2019]. Long-distance  
505 dispersal might be due to the boxwood trade between European countries, and probably to a much lesser extent by  
506 the natural dispersal of moths. We therefore expect that in practise only frequent long-distance dispersal can lead  
507 to the extinction of the moth, due to global resource depletion.

## 508 Results for hypothesis 4

509 Next, we predict that the coexistence regime depends on the landscape characteristics, in particular its size (4a)  
510 and the proportion of suitable boxwood patches (4b). To do so, we use wrapped landscapes (with no edge effect) of



511 different sizes and different proportions of randomly distributed suitable patches (Figure 8a). Below 200\*200 cells,  
512 which corresponds to about 12 000 km<sup>2</sup>, coexistence does not occur within the realistic range of parameter values,  
513 because previously defoliated patches are quickly recolonized by the moth and lack time to grow back. This induces  
514 a global resource collapse and drives the moth to extinction. Above the 200\*200 threshold, the larger the landscape  
515 is, the more likely the coexistence occurs, in line with hypothesis 4a. In the previous sections, we restrict our model  
516 to the French Alps, but we expect that long term coexistence is even more likely on the European scale because  
517 larger landscapes favor coexistence. The influence of landscape size is also apparent in the real landscape, with a  
518 uniform and short-range dispersal kernel: when the invasion begins in a relatively isolated area of the landscape,  
519 coexistence is impaired by small size.

520 A priori, the effect of the initial proportion of boxwood patches on coexistence is unclear (4b) because on the  
521 one hand a higher proportion of suitable patches provides more resources to the moths, while on the other hand  
522 it may trigger moth outbreaks which ultimately leads to resource depletion. We find that the latter mechanism  
523 is on the driver's seat: reducing the proportion of boxwood patches increases the probability of moth persistence  
524 (Figure 8a). More precisely, the landscapes larger than 400\*400 cells filled with less than 20% of boxwood patches  
525 almost always allow coexistence. In such cases, most dispersal events fail to find suitable patches, lowering the moth  
526 population density, which in turn leaves more time for leaves to grow back. On the contrary, a high proportion of  
527 suitable patches results in high moth densities which leads to global over-exploitation, despite a potentially higher  
528 leaf biomass.

529 The coexistence regime has interesting consequences on the final proportion of boxwood patches, which corre-  
530 sponds to the initial proportion minus the proportion of patches which wither completely due to over-exploitation.  
531 Under coexistence, the final proportion increases linearly with the initial proportion with a weak slope of about 0.1,  
532 whereas the slope is close to 1 in the case of moth extinction (Figure 8b). This indicates that the local extinction of  
533 boxwood patches is not responsible for global moth extinction. Instead, the final proportion of boxwood patches is a  
534 long-term consequence of coexistence and results from their gradual death (Figure 8c). During each moth outbreak,  
535 a small proportion of the boxwood patches disappears due to over exploitation. Then, right after the outbreak a few  
536 boxwood patches are recolonized from neighbouring patches (only previously occupied patches can be recolonized),  
537 which induces a clustered distribution of the boxwood patches. As a result of clustering, the aggregation index is  
538 always positive, which indicates that the landscapes created by long-term coexistence are more aggregated than  
539 random landscapes. Boxwood patches relatively isolated in the initial landscape experience larger extinction rates  
540 and create holes in the landscape. In contrast, areas where boxwood patches are initially more abundant persist  
541 more often, which creates clusters. Moreover, the aggregation increases with the average moth dispersal distance  
542 (Figure 8d). Boxwood patches favor moth outbreaks: increasing the boxwood patches proportion over the landscape  
543 produces severe outbreaks. This induces apparent competition between boxwood patches because of their shared  
544 pest. With low dispersal distance, apparent competition between patches is mainly local, which limits the forma-  
545 tion of clusters. Instead, with high dispersal distance apparent competition is global and the aggregated pattern  
546 results from the interplay between local facilitation (recolonization of boxwood patches is purely local) and global  
547 competition, as in many spatially self-structured systems [Kéfi et al., 2007, 2008]. This is confirmed by simulations  
548 where boxwood recolonization is global, in that case the aggregation process vanishes (details not shown).

549 We further explore how the aggregation process creates boxwood clusters of different sizes, for various dispersal

550 distance. To do so, we start with landscapes which are initially filled with boxwood patches, and run simulations  
551 after invasion by the moth. At the end of the simulations, we fit a power-law model to the final distribution of the  
552 cluster sizes (Figure 9 top). Clusters smaller than 5 boxwood patches are excluded from the fit. We find that small  
553 dispersal distance leads to a cluster size distribution closer to a power-law than large dispersal distance. When the  
554 dispersal distance is large (10 to 50 cells), the cluster size distribution follows a truncated power law (Figure 9 top),  
555 which indicates that large clusters are under-represented. Large dispersal distance leads to an increase of herbivory,  
556 which produces two distinct effects. On the one hand, it favors aggregation due to global apparent competition, as  
557 discussed earlier (Figure 8d). On the other hand, it increases the death rate of boxwood patches and thus reduces  
558 the final proportion of patches in the landscape (Figure 8e). This is why under large dispersal distance (10 to 50  
559 cells) the final landscapes has a homogeneous aspect of equally spaced small clusters (Figure 9 bottom).

560 These regular patterns are similar to Turing instabilities [Turing, 1990, Murray, 2001] and result from "scale-  
561 dependent feedbacks" which combine short-distance positive feedbacks and long-distance negative feedbacks [Rietk-  
562 erk and van de Koppel, 2008]. In the present case, short-distance positive feedback correspond to local facilitation  
563 of boxwood due to recruitment while apparent competition between boxwood stands because of their shared pest  
564 mirror long-distance negative feedbacks. Several studies have investigated how spatial patterns can emerge from  
565 such scale-dependent feedbacks in a variety of ecological scenarios, such as plant-water interactions [Klausmeier,  
566 1999, von Hardenberg et al., 2001, Rietkerk et al., 2002, Meron et al., 2004, Kéfi et al., 2010], plant-plant interactions  
567 [Lejeune et al., 1999], or predator-prey interactions [Levin and Segel, 1976, Solé and Bascompte, 2012]. It has been  
568 shown that such spatial patterns emerge in predator-prey systems when the predator has a larger dispersal capacity  
569 than the prey [Gurney et al., 1998, de Roos et al., 1998]. We demonstrate here that this can also be the case in the  
570 context of a plant-herbivore system, using a model calibrated empirically.

## 571 Implications for management

572

573 First, the most important finding for management purposes is that the moth heavily impacts boxwood stands. With  
574 the estimated parameter values, we find that in the study area only 15% of the initial boxwood biomass remains  
575 (Figure 4b) and that 48% of the original boxwood patches completely disappear (Figure 4c), which represents 2414  
576 square kilometres in the French Alps. Under low moth fecundity and high caterpillar survival, the moths could  
577 persist longer in heavily defoliated patches. The severe decrease in box tree biomass can impact the many species  
578 associated with boxwood, as well as the ecosystem services provided by the shrub (i.e sediment trapping and water  
579 storage) [Mitchell et al., 2018]. In stands where boxwood is severely weakened or extinguished, recolonization by  
580 neighbouring patches may be prevented by pioneer plants, potentially other invasive species such as *Buddleja davidii*  
581 or *Ailanthus altissima*, in a kind of 'invasion meltdown' process [Simberloff and Holle, 1999].

582 Next, the periodic invasion dynamics can lead to confusion regarding the persistence of the box tree moth.  
583 A period of low overall abundance should not be confused with a decrease in invasion, and moth control methods  
584 should take periodic invasion dynamics into account. Remote sensing methods may be appropriate in order to detect  
585 the few boxwood stands that provide refuge under low moth abundance [Kerr and Ostrovsky, 2003]. We suggest  
586 that detecting stands of undefoliated boxwood that allow moth persistence during a period of low abundance could

587 provide an interesting management strategy, since control efforts could be increased on these particular patches.

588 Finally, management actions might consider preventing anthropogenic long-distance dispersal. However, we find  
589 that only very limited dispersal could lead to moth extinction, which occurs with a uniform distribution of dispersal  
590 events of no more than 4 cells (Figure 7b, dotted line). As soon as dispersal is higher, the moth could escape  
591 dead ends in the landscape and therefore persists. Even if anthropogenic long-distance dispersal is prevented, a  
592 few natural long-distance dispersal events might ensure moth persistence. It is therefore unlikely that management  
593 actions limiting dispersal can be able to eradicate the moth. However, such actions can reduce the impact on  
594 boxwood stands, since we find that long-distance dispersal increases the extinction rate of boxwood patches (Figure  
595 8e).

596 Three scenarios may occur after the invasion of box tree moth in Europe: extinction of both species, extinction  
597 of the moth only, or coexistence. Our theoretical approach combined with field and experimental data suggests  
598 that coexistence is the most likely outcome, with cycles of moth outbreaks and crashes. Coexistence comes along  
599 with a severe reduction of boxwood biomass at the landscape scale: boxwood stands may therefore become closer  
600 to brown than green. Moth extinction can also occur, which indicates that the invasion dynamics of exotic pests  
601 can be mitigated even in the absence of predators and effective plant defenses.

602 We further show that plant-herbivore coexistence through spatial effects does not require poorly mobile wing-  
603 less species, as in our model a wide range of dispersal values result in coexistence. Coexistence occurs in large  
604 landscapes, long-distance dispersal thus requires a spatial scaling-up for the persistence of the system. Particularly  
605 intense long-distance dispersal nevertheless leads to herbivore extinction, provided that plant grows back slowly.  
606 In that case, the herbivore depletes its resources at the global scale, which leads to its own extinction even with-  
607 out a complete synchronization of the local dynamics. Finally, coexistence is easier in patchy landscapes because  
608 unsuitable patches increase moth mortality during dispersal and thereby reduce the global insect population size.  
609 Interestingly, when plants disperse locally the spatial dynamics of the system lead to the formation of such a patchy  
610 landscape, with relatively small plant patches evenly distributed in the landscape. The system thus creates its own  
611 stability conditions.

## 612 Acknowledgements

- 613 • We thank all the student interns who participated in both field and experimental work: Aristide Chauveau,  
614 Alison Dilien, Jessica Barbe and Océane Guillot. We also thank Elisabeth Tabone and Thomas Defferier  
615 (INRAE) for their mass measurements on their farmed caterpillars, and Audrey Bras (INRAE) for the flight  
616 distance data and fruitful exchanges.
- 617 • This article is financially supported by AAP USMB and FREE federation. The PhD scholarship of L. Ledru  
618 is funded by the French Ministry for Education and Research. J. Garnier acknowledges NONLOCAL project  
619 (ANR-14-CE25-0013), GLOBNETS project (ANR-16-CE02-0009) and the European Research Council (ERC)  
620 under the European Unions Horizon 2020 research and innovation programme (grant agreement no. 639638,  
621 MesoProbio).

## 622 References

- 623 Ahmed, D., Choudhary, M.I., Turkoz, S., and Sener, B. (1988) Chemical constituents of *Buxus sempervirens*.  
624 - *Planta Med.* 54:173–174.
- 625 Amarasekare, P. (2008) Spatial Dynamics of Foodwebs. - *Annu. Rev. Ecol. Evol. S.* 39: 479–500.  
626
- 627 Bella, S. (2013) The box tree moth *Cydalima perspectalis* (walker, 1859) continues to spread in southern  
628 Europe: new records for Italy (*lepidoptera pyraloidea crambidae*). - *Redia* 96: 51–55.
- 629
- 630 Berryman, A.A. (1987) The theory and classification of outbreaks. - In: *Insect Outbreaks*. Academic press  
631 Inc., pp.3-30.
- 632
- 633 Blackburn, T.M., Pyšek, P., Bacher, S., Carlton, J.T., Duncan, R.P., Jarošík, V., Wilson, J.R. and Richard-  
634 son, D.M. (2011) A proposed unified framework for biological invasions. - *Trends Ecol. Evol.* 26: 333–339.
- 635
- 636 Bras, A., Avtzis, D.N., Kenis, M., Li, H., Véték, G., Bernard, A., Courtin, C., Rousselet, J., Roques, A. and  
637 Auger-Rozenberg, M.A. (2019) A complex invasion story underlies the fast spread of the invasive box tree  
638 moth (*cydalima perspectalis*) across Europe. - *J. Pest. Sci.* 92(3): 1187-1202.
- 639
- 640 Carlsson, N.O., Sarnelle, O. and Strayer, D.L. (2009) Native predators and exotic prey –an acquired taste ?.  
641 - *Front. Ecol. Environ.* 7: 525–532.
- 642
- 643 Comins, H.A. and Hassell, M.P. (1996) Persistence of multispecies host–parasitoid interactions in spatially  
644 distributed models with local dispersal. - *J. Theor. Biol.* 183: 19–28.
- 645
- 646 Cuddington, K.M. and Yodzis, P. (2000) Diffusion-Limited Predator-Prey Dynamics in Euclidean Environ-  
647 ments. - *Theor. Popul. Biol.* 58: 259-278.
- 648
- 649 De Roos, A.M., McCauley, E. and Wilson, W.G. (1991) Mobility versus density-limited predator-prey dy-  
650 namics on different spatial scales. - *Proc. Royal Soc. B* 246: 117-122.
- 651
- 652 De Roos, A.M., McCauley, E. and Wilson, W.G. (1998) Pattern Formation and the Spatial Scale of Interac-  
653 tion between Predators and Their Prey. - *Theor. Popul. Biol.* 53:108-130.
- 654
- 655 Denno, R.F., Lewis, D. and Gratton, C. (2005) Spatial variation in the relative strength of top-down and  
656 bottom-up forces: causes and consequences for phytophagous insect populations. - *Ann. Zool. Fenn.* 295–311.
- 657
- 658 Devkota, K.P., Lenta, B.N., Fokou, P.A. and Sewald, N. (2008) Terpenoid alkaloids of the *Buxaceae* family  
659 with potential biological importance. - *Nat. Prod. Rep.* 25: 612–630.
- 660
- 661 Domenico, F., Lucchese, F. and Magri, D. (2012) *Buxus* in Europe: Late quaternary dynamics and modern  
662 vulnerability. - *Perspect. Plant. Ecol.* 14: 354–362.
- 663
- 664 Eber, S. and Brandl, R. (1996) Metapopulation dynamics of the tephritid fly *Urophora cardui*: an evaluation  
665 of incidence-function model assumptions with field data. - *J. Anim Ecol.* 621–630.
- 666
- 667

- 668 Feldtrauer, J.-F., Feldtrauer, J.J. and Brua, C. (2009) Premiers signalements en France de la pyrale du buis *di-*  
669 *aphania perspectalis* (Walker, 1859), espèce exotique envahissante s'attaquant aux buis (*Lepidoptera, Crambidae*).  
670 - Bull. Soc. Entomol. Mulhouse. 65: 55–58.
- 671 Fox, J.W., Vasseur, D., Cotroneo, M., Guan, L. and Simon, F. (2017) Population extinctions can increase  
672 metapopulation persistence. - Nat. Ecol. Evol. 1:1271–1278.
- 674 Gillespie, R.G., Baldwin, B.G., Waters, J.M., Fraser, C.I., Nikula, R. and Roderick, G.K. (2012) Long-distance  
675 dispersal: a framework for hypothesis testing. - Trends Ecol. Evol. 27: 47–56.
- 677 Göttig, S. and Herz, A. (2016) Are egg parasitoids of the genus *Trichogramma* (*Hymenoptera: Trichogram-*  
678 *matidae*) promising biological control agents for regulating the invasive Box tree pyralid, *Cydalima perspec-*  
679 *talis* (*Lepidoptera: Crambidae*)?. - Biocontrol Sci. and Techn. 26: 1471–1488.
- 681 Göttig, S. (2017) Development of eco-friendly methods for monitoring and regulating the box tree pyralid,  
682 *Cydalima perspectalis* (*Lepidoptera: Crambidae*), an invasive pest in ornamentals, PhD thesis, Technische  
683 Universität.  
684
- 685 Göttig, S. and Herz, A. (2017) Observations on the seasonal flight activity of the box tree pyralid *Cydalima*  
686 *perspectalis* (*Lepidoptera: Crambidae*) in the Rhine-Main Region of Hesse. Journal of Cultivated Plants. 69:  
687 157–165.
- 689 Göttig, S. and Herz, A. (2018) Susceptibility of the Box tree pyralid *Cydalima perspectalis* Walker (*Lepi-*  
690 *doptera: Crambidae*) to potential biological control agents Neem (NeemAzalR®-T/S) and entomopathogenic  
691 nematodes (NemastarR®) assessed in laboratory bioassays and field trials. - J. Plant. Dis. Protect. 125:  
692 365–375.
- 694 Gurney, W.S.C., Veitch, A.R., Cruickshank, I. and McGeachin, G. (1998) Circles and Spirals: Population  
695 Persistence in a Spatially Explicit Predator-Prey Model. - Ecology. 79: 2516.
- 697 Hairston, N.G., Smith, F.E. and Slobodkin, L.B. (1960) Community structure, population control, and com-  
698 petition. - Am. Nat. 94: 421–425.
- 700 Halley, J.M. and Dempster, J.P. (1996) The Spatial Population Dynamics of Insects Exploiting a Patchy Food  
701 Resource: A Model Study of Local Persistence. - J Appl Ecol. 33: 439–454.
- 703 Hanski, I. and Gilpin, M.E. (1997) Metapopulation biology. - CA: Academic press, San Diego.
- 705 Harary, F. and Harborth, H. (1976) Extremal animals. - J. Combinator. Inform. Syst. Sci. 1: 1–8.
- 707 Harrison, S., Thomas, C.D. and Lewinsohn, T.M. (1995) Testing a metapopulation model of coexistence in  
708 the insect community on ragwort (*Senecio jacobaea*). - Am. Nat. 145: 546–562.
- 710 Hassell, M.P., Comins, H.N. and May, R.M. (1991) Spatial structure and chaos in insect population dynam-  
711 ics. - Nature. 353: 255–258.
- 713

- 714 Holyoak, M. and Lawler, S.P. (1996) Persistence of an extinction-prone predator-prey interaction through  
715 metapopulation dynamics. - Ecology. 77: 1867–1879.
- 716 Holyoak, M., Leibold, M.A. and Holt, R.D. (2005) Metacommunities: Spatial Dynamics and Ecological Com-  
717 munities. – University of Chicago Press.
- 719 Johst, K., Brandl, R. and Eber, S. (2002) Metapopulation persistence in dynamic landscapes: The role of  
720 dispersal distance. - Oikos. 98: 263–270.
- 722 Johst, K. and Schöps, K. (2003) Persistence and conservation of a consumer–resource metapopulation with  
723 local overexploitation of resources. - Biol. Conserv. 109: 57–65.
- 725 Kang, Y. and Armbruster, D. (2011) Dispersal effects on a discrete two-patch model for plant–insect interac-  
726 tions. - J. Theor. Biol. 268: 84–97.
- 728 Kawazu, K., Nakamura, S. and Adati, T. (2010) Rearing of the box tree pyralid, *Glyphodes perspectalis*, larvae  
729 using an artificial diet. - Appl. Entomol. Zool. 45: 163–168.
- 731 Kéfi, S., Rietkerk, M., van Baalen, M. and Loreau, M. (2007) Local facilitation, bistability and transitions in  
732 arid ecosystems. - Theor. Popul. Biol. 71: 367–379.
- 734 Kéfi, S., van Baalen, M., Rietkerk, M. and Loreau, M. (2008). Evolution of Local Facilitation in Arid Ecosys-  
735 tems. - Am. Nat. 172: E1–E17.
- 737 Kéfi, S., Eppinga, M.B., de Ruiter, P.C. and Rietkerk, M. (2010) Bistability and regular spatial patterns in  
738 arid ecosystems. - Theor. Ecol. 3: 257–269.
- 740 Kenis, M., Nacambo, S., Leuthardt, F.L.G., Domenico, F.D. and Haye, T. (2013) The box tree moth, *Cy-  
741 dalima perspectalis*, in Europe: horticultural pest or environmental disaster ?. - Aliens: The Invasive Species  
742 Bulletin. 33: 38–41.
- 744 Kerr, B., Riley, M.A., Feldman, M.W. and Bohannan, B.J. (2002) Local dispersal promotes biodiversity in a  
745 real-life game of rock–paper–scissors. - Nature. 418: 171–174.
- 747 Kerr, J. and Ostrovsky, M. (2003) From space to species: Ecological applications for remote sensing. - Trends  
748 Ecol. Evol. 18: 299–305.
- 750 Klausmeier, C.A. (1999) Regular and Irregular Patterns in Semiarid Vegetation. - Science. 284: 1826–1828.
- 752 Klein, E.K., Lavigne, C. and Gouyon, P.H. (2006) Mixing of propagules from discrete sources at long distance:  
753 Comparing a dispersal tail to an exponential. - BMC Ecol. 6: 3.
- 755 Lambin, X., Elston, D.A., Petty, S.J. and MacKinnon, J.L. (1998) Spatial asynchrony and periodic travelling  
756 waves in cyclic populations of field voles. - P. Roy. Soc. B-Biol. Sci. 265: 1491–1496.
- 758 Lejeune, O., Couteron, P. and Lefever, R. (1999) Short range co-operativity competing with long range inhi-  
759 bition explains vegetation patterns. - Acta Oecol. 20: 171–183.
- 760

- 761 Leuthardt, F. and Baur, B. (2013) Oviposition preference and larval development of the invasive moth *Cy-*  
762 *dalima perspectalis* on five european box-tree varieties. - J. Appl. Entomol. 137: 437–444.
- 764 Leuthardt, F.L., Glauser, G. and Baur, B. (2013) Composition of alkaloids in different box tree varieties and  
765 their uptake by the box tree moth *Cydalima perspectalis*. - Chemoecology 23: 203–212.
- 767 Levin, S.A. and Segel, L.A. (1976) Hypothesis for origin of planktonic patchiness. - Nature. 259:659-659.
- 769 Loru, F., Duval, D., Aumelas, A., Akeb, F., Guédon, D. and Guedj, R. (2000) Four steroidal alkaloids from  
770 the leaves of *Buxus sempervirens*. - Phytochemistry. 54: 951–957.
- 772 Mally, R. and Nuss, M. (2010) Phylogeny and nomenclature of the box tree moth, *Cydalima perspectalis*  
773 (Walker, 1859) comb. n., which was recently introduced into Europe (*Lepidoptera: Pyraloidea: Crambidae:*  
774 *Spilomelinae*). - Eur. J. Entomol. 107: 393–400.
- 776 Maruyama, T. and Shinkaji, N. (1987) Studies on the life cycle of the box-tree pyralid, *Glyphodes perspectalis*  
777 (walker)(*lepidoptera: Pyralidae*). I. seasonal adult emergence and developmental velocity. - Jpn. J. Appl.  
778 Entomol. Z. 31: 226–232.
- 780 Maruyama, T. and Shinkaji, N. (1991) The life-cycle of the box-tree pyralid, *glyphodes perspectalis* (walker)(*lepidoptera:*  
781 *Pyralidae*). II. developmental characteristics of larvae. - Jpn. J. Appl. Entomol. Z. 35: 221–230.
- 783 Melbourne, B., Cornell, H.V., Davies, K.F., Dugaw, C.J., Elmendorf, S., Freestone, A.L., Hall, R.J., Har-  
784 rison, S., Hastings, A., Holland, M. and Holyoak, M. (2007) Invasion in a heterogeneous world: resistance,  
785 coexistence or hostile takeover ?. - Ecol. Lett. 10: 77–94.
- 787 Meron, E. Gilad, E., von Hardenberg, J., Shachak, M. and Zarmi, Y. (2004) Vegetation patterns along a  
788 rainfall gradient. - chaos soliton fract. 19: 367-376.
- 790 Mitchell, R., Chitanava, S., Dbar, R., Kramarets, V., Lehtijärvi, A., Matchutadze, I., Mamadashvili, G., Mat-  
791 siakh, I., Nacambo, S., Papazova-Anakieva, I. and Sathyapala, S. (2018) Identifying the ecological and societal  
792 consequences of a decline in *Buxus* forests in Europe and the Caucasus. - Biol. Invasions. 20: 3605–3620.
- 794 Murray, J.D. (2001) Spatial Pattern Formation with Reaction Diffusion Systems. - In: Mathematical biology  
795 II. Springer-Verlag, pp.71-130.
- 797 Myers, J.H. (1976) Distribution and Dispersal in Populations Capable of Resource Depletion. A Simulation  
798 Model. - Oecologia. 23: 255-269.
- 800 Myers, J.H. and Campbell, B.J. (1976) Distribution and dispersal in populations capable of resource deple-  
801 tion. - Oecologia. 24: 7-20.
- 803 Nacambo, S., Leuthardt, F.L., Wan, H., Li, H., Haye, T., Baur, B., Weiss, R.M. and Kenis, M. (2014) Devel-  
804 opment characteristics of the box-tree moth *Cydalima perspectalis* and its potential distribution in Europe. -  
805 J. Appl. Entomol. 138: 14–26.
- 806



- 807 Nachman, G. (1988) Regional persistence of locally unstable predator/prey populations. - Exp. Appl. Acarol.  
808 5: 293–318.
- 809
- 810 Palmqvist, E. and Lundberg, P. (1998) Population extinctions in correlated environments. - Oikos. 359–367.  
811
- 812 Polis, G.A. (1999) Why are parts of the world green ? Multiple factors control productivity and the distribu-  
813 tion of biomass. - Oikos. 3–15.  
814
- 815 Rietkerk, M. and van de Koppel, J. (2008) Regular pattern formation in real ecosystems. - Trends Ecol. Evol.  
816 23: 169-175.  
817
- 818 Rietkerk, M., Boerlijst, M.C., van Langevelde, F., HilleRisLambers, R., van de Koppel, J., Kumar, L., Prins,  
819 H.H.T. and de Roos, A.M. (2002) Self-organization of vegetation in arid ecosystems. - Am. Nat. 160: 524-530.  
820
- 821 Salisbury, A., Korycinska, A. and Halstead, A.J. (2012) The first occurrence of larvae of the box tree moth,  
822 *Cydalima perspectalis* (lepidoptera: Crambidae) in private gardens in the uk. - Brit. J. Ent. Nat. Hist. 25:  
823 1.  
824
- 825 Santi, F., Radeghieri, P., Sigurta, G.I. and Maini, S. (2015) Sex pheromone traps for detection of the invasive  
826 box tree moth in Italy. - B. Insectol. 68: 158-160.  
827
- 828 Schöps, K. (2002) Local and regional dynamics of a specialist herbivore: overexploitation of a patchily dis-  
829 tributed host plant. - Oecologia. 132: 256–263.  
830
- 831 Shaw, M.W. (1995) Simulation of population expansion and spatial pattern when individual dispersal distri-  
832 butions do not decline exponentially with distance. - Proc. Royal Soc. B. 259: 243-248.  
833
- 834 Sherratt, J.A. (2001) Periodic travelling waves in cyclic predator–prey systems. - Ecol. Lett. 4: 30–37.  
835
- 836 Simberloff, D. and Holle, B. (1999) Positive interactions of nonindigenous species: Invasional meltdown ? -  
837 Biol. Invasions 1: 12.  
838
- 839 Slansky Jr, F. and Scriber, J. (1982) Selected bibliography and summary of quantitative food utilization by  
840 immature insects. - Bull. Ecol. Soc. Am. 28: 43–56.  
841
- 842 Solé, R. and Bascompte, J. (2012) Spatial Self-Organization From Pattern to Process. - In: Self-Organization  
843 in Complex Ecosystems. Princeton University Press, pp.65-125.  
844
- 845 Stelter, C., Reich, M., Grimm, V. and Wissel, C. (1997) Modelling Persistence in Dynamic Landscapes:  
846 Lessons from a Metapopulation of the Grasshopper *Bryodemis tuberculata*. - J. Anim. Ecol. 66: 508–518.  
847
- 848 Szilágyi, A., Scheuring, I., Edwards, D.P., Orivel, J. and Yu, D.W. (2009) The evolution of intermediate  
849 castration virulence and ant coexistence in a spatially structured environment. - Ecol. Lett. 12: 1306–1316.  
850
- 851 Taylor, A.D. (1991) Studying metapopulation effects in predator-prey systems. - Biol. J. Linnean. Soc. 42:  
852 305–323.  
853

- 854  
855 Tschardtke, T. and Brandl, R. (2004) Plant-insect interactions in fragmented landscapes. - Annu. Rev. En-  
856 tomol. 49: 405–430.
- 857  
858 Van der Meijden, E. (1979) Herbivore exploitation of a fugitive plant species: local survival and extinction of  
859 the cinnabar moth and ragwort in a heterogeneous environment. - Oecologia. 307–323.
- 860  
861 Turing, A.M. (1990) The chemical basis of morphogenesis. - Bull. Math. Biol. 52: 153-197.
- 862  
863 Uchmański, J. (2019) Cyclic outbreaks of forest insects: A two-dimensional individual-based model. - Theor.  
864 Popul. Biol. 128: 1-18.
- 865  
866 Van der Meijden, E. and Van der Veen-van, C. A. (1997) Tritrophic metapopulation dynamics: a case study  
867 of ragwort, the cinnabar moth, and the parasitoid *Cotesia popularis*. - In: Metapopulation Biology. CA:  
868 Academic press, pp.387–405.
- 869  
870 Van der Straten, M. and Muus, T. (2010) The box tree pyralid, *Glyphodes perspectalis* (lepidoptera: *Cram-*  
871 *bidae*), an invasive alien moth ruining box trees. Proc. Neth. Soc. Meet. 21: 107–111.
- 872  
873 von Hardenberg, J., Meron, E., Shachak, M. and Zarmi, Y. (2001) Diversity of Vegetation Patterns and  
874 Desertification. - Phys. Rev. 87: 198101.
- 875  
876 Wan, H., Haye, T., Kenis, M., Nacambo, S., Xu, H., Zhang, F. and Li, H. (2014) Biology and natural enemies  
877 of *Cydalima perspectalis* in Asia: Is there biological control potential in Europe ?. - J. Appl. Entomol. 138:  
878 715–722.
- 879  
880 Wilkinson, D.M. and Sherratt, T.N. (2016) Why is the world green ? The interactions of top–down and  
881 bottom–up processes in terrestrial vegetation ecology. - Plant Ecol. Divers. 9: 127–140.
- 882  
883 Wilson, R.J. and Thomas, C.D. (2002) Dispersal and the spatial dynamics of butterfly populations. - In:  
884 Dispersal ecology. Blackwell Science, pp.257–278.
- 885  
886 Winder, L., Alexander, C.J., Holland, J.M., Woolley, C. and Perry, J.N. (2001) Modelling the dynamic  
887 spatio-temporal response of predators to transient prey patches in the field. - Ecol. Lett. 4: 568–576.

## Tables

Table 1: Model parameters. The values correspond to those most representative of actual ecological conditions. The parameters are either measured quantitatively, i.e. a direct value of the parameter concerned is measured, or qualitatively, i.e. the measurement of a process allows the calibration of the associated parameter. We estimate the unmeasured parameters from the model simulations, and aim to be consistent with the ecological situation. The parameters obtain from the literature come from :  $f$  [Kawazu et al., 2010, Wan et al., 2014],  $\alpha$  [Slansky Jr and Scriber, 1982],  $S_{m,max}$  [Kawazu et al., 2010]. The source listed as "experiment" corresponds to the measurements of moth weights made by the INRAE for  $\alpha$ , and the mesocosm experiment for  $\sigma_m$ ,  $\sigma_l$  and  $S_{m,max}$ . "Flight carousel experiment" corresponds to the measurements made by Bras et al. from the INRAE.

|               | Settings       | Measured     | Values               | Unit                                                             | Meaning                                                                  | Source                     |
|---------------|----------------|--------------|----------------------|------------------------------------------------------------------|--------------------------------------------------------------------------|----------------------------|
| Leaves        | $v$            | No           | 0.98                 | $\frac{1}{t}$                                                    | Leaf survival rate at senescence                                         | estimate                   |
|               | $r_f$          | No           | 0.4                  | $\frac{1}{t}$                                                    | Leaf growth rate                                                         | estimate                   |
|               | $L_{max}$      | No           | $\frac{1}{3}W_{max}$ | $g.ha^{-1}$                                                      | Leaf carrying capacity                                                   | estimate                   |
|               | $r_0$          | Quantitative | $5 * 10^{-3}$        | $\frac{1}{t}$                                                    | Offshoot production rate                                                 | field                      |
|               | $\sigma_l$     | Qualitative  | 0.01                 | -                                                                | Consumption function setting                                             | experiment                 |
| Wood          | $W_{max}$      | No           | $3 * 10^9$           | $g.ha^{-1}$                                                      | Wood carrying capacity                                                   | estimate                   |
|               | $d_{max}$      | Quantitative | 0.74                 | -                                                                | Saturation value of the maximum mortality function $D_{max}(\rho)$       | field                      |
|               | $\beta_s$      | No           | 10                   | -                                                                | Setting of the wood mortality function by consumption (curvature)        | estimate                   |
|               | $\theta_s$     | No           | 1.2                  | -                                                                | Setting of the wood mortality function by consumption (inflection point) | estimate                   |
|               | $\beta_r$      | No           | 5                    | -                                                                | Setting of the wood growth function (curvature)                          | estimate                   |
|               | $\theta_r$     | No           | $5 * 10^{-5}$        | -                                                                | Setting of the wood growth function (inflection point)                   | estimate                   |
|               | $r_{w,max}$    | Qualitative  | 0.3                  | -                                                                | Saturation value of the wood growth function                             | field                      |
|               | $r_{w,min}$    | No           | 1                    | -                                                                | Saturation value of the growth deficit function $\gamma_0$               | estimate                   |
|               | $d$            | No           | 0.95                 | -                                                                | Setting of the growth deficit function $\gamma_0$                        | estimate                   |
|               | $\omega_1$     | No           | 0.1                  | -                                                                | Setting of the wood dispersal function                                   | estimate                   |
|               | $\omega_{max}$ | No           | $1 * 10^{-5}$        | -                                                                | Maximum proportion of wood that can contribute to dispersal              | estimate                   |
| Box tree moth | $f$            | Quantitative | 120                  | individual                                                       | Box tree moth fecundity                                                  | literature                 |
|               | $\alpha$       | Quantitative | 0.3                  | g                                                                | Amount of leaf needed by a box tree moth for its larval cycle            | literature and experiment  |
|               | $\sigma_m$     | Qualitative  | 0.85                 | -                                                                | Setting of caterpillar survival function                                 | experiment                 |
|               | $S_{m,max}$    | Quantitative | 0.49                 | $\frac{1}{t}$                                                    | Maximum caterpillar survival rate                                        | literature and experiment  |
|               | $s$            | No           | 0.4                  | $\frac{1}{t}$                                                    | Survival rate of adults (moths)                                          | estimate                   |
|               | $M_{m,max}$    | No           | 0.01                 | $\frac{1}{t}$                                                    | Survival rate of adults during dispersal                                 | estimate                   |
|               | $\delta$       | No           | 0.01                 | -                                                                | Parameter of the dispersal function                                      | estimate                   |
|               | $c$            | Qualitative  | 0.5                  | -                                                                | Tail shape parameter of the Exponential power distribution               | flight carousel experiment |
| $\alpha_d$    | Quantitative   | 25           | cells                | Average dispersal distance of the Exponential power distribution | flight carousel experiment                                               |                            |

## 888 Figure legends

889 **Fig. 1** Model of dynamics between the boxwood, separated into wood and leaves, and the box tree moth. The  
890 arrows show the interaction between the three variables

891 **Fig. 2** Main results of mesocosm manipulation with measurement of defoliation intensity and box tree moth sur-  
892 vival according to competition for the resource  $\mu$ . (a) leaf consumption function  $\frac{S_l(\mu)}{v}$ . (b) box tree moth survival  
893 function  $S_m(\mu)$ .

894 **Fig. 3** Visualization of invasion dynamics in the local model. Simulation with ecologically realistic parameters  
895 given in Table 1

896 **Fig. 4** Final state maps in the real landscape in function of fertility  $f$  and maximum survival  $S_{m,max}$ . (a)  
897 landscape-scale probability of moth persistence, (b) landscape-scale wood biomass expressed as a percentage of  
898 the landscape-scale carrying capacity, (c) number of boxwood patches disappearing as a percentage of the initial  
899 number of boxwood patches, (d) landscape-scale moth biomass, (e) number of patches invaded as a percentage of  
900 the number of boxwood patches present, (f) time of moth persistence. The ecologically realistic parameter values  
901 are  $f = 120$  and  $S_{m,max} = 0.5$ .

902 **Fig. 5** Effect of the leaf intrinsic growth rate on the mean percentage of invaded patches. The percentage drop  
903 to zero when the moth do not persist in these conditions (when  $r_f < 0.22$ ). The two inserts show the invasion  
904 dynamics for two growth rate values.

905 **Fig. 6** Example of global population dynamics in the case of coexistence (a) and moth collapse (b). (c) maximum  
906 % of invaded patches. (d) maximum moth biomass. (e) minimum leaf biomass. Parameters values as in Table 1,  
907 except for  $r_0 = 2 * 10^{-3}$  and for the average dispersal distance  $\alpha_d$  which either equals 5 cells (moth persistence) or  
908 70 cells (moth collapse)

909 **Fig. 7** (a) Effect of the rate of new leaves production by the wood ( $r_0$ ) on the probability of moth persistence. For  
910 each tested value, the probability of persistence is obtained by 50 simulations conduct on the realistic landscape with  
911 random initial patch of invasion. Three average dispersal distances are tested, a realistic distance of 25 cells, a very  
912 short distance of one cell, and a very large distance of 70 cells. (b) Effect of the average dispersal distance on the  
913 probability of moth persistence. For each tested value, the probability of persistence is obtained by 50 simulations  
914 conduct on the realistic landscape with random initial patch of invasion. Each time two dispersal functions are  
915 tested: a fat-tailed function, and an uniform function. The minimum dispersal distance is one cell. The inserts  
916 show the percentage of patch invaded over time for three selected average dispersal distances of 1, 5 and 70 cells  
917 with the fat tail dispersal function.

918 **Fig. 8** Simulation in theoretical landscapes. (a) The probability of moth persistence depends on space size and on  
919 the initial proportion of boxwood patches. (b) In the case of coexistence, the final proportion of boxwood patches  
920 is much lower than the initial proportion because moth outbreaks cause patch extinctions. (c) The boxwood pro-  
921 portion in the landscape declines during each moth outbreak. (d) The aggregation index increases along with the  
922 average dispersal distance. (e) In coexistence, increasing the dispersal distance reduces the final proportion of box-  
923 wood patches in the landscape. All other parameter values are set to the realistic values.

924 **Fig. 9** Effect of moth dispersal distance (increasing from left to right) on the size distribution of boxwood clusters  
925 at the end of the simulations (5000 time steps), in large theoretical landscapes of 550\*550 cells. Top: regression

926 lines correspond to the fit to a power-law distribution. The first size class (black square) has been excluded from  
927 the regression. Bottom : snapshot of the landscape at the end of the simulation, black cells indicate live boxwood  
928 patches. All other parameter values are set to the realistic values.

929

## Figures

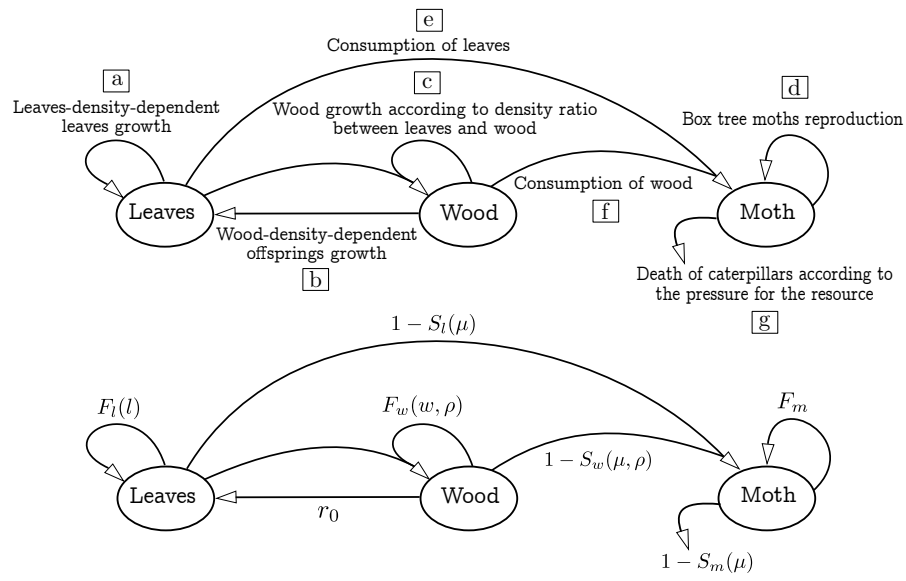

Figure 1



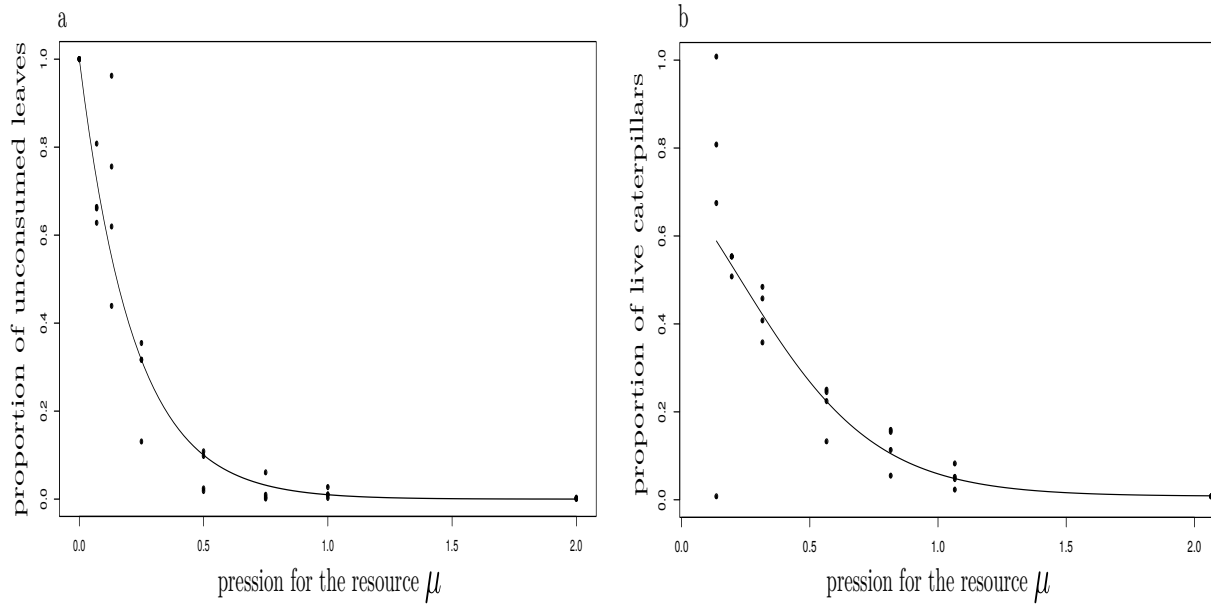

Figure 2

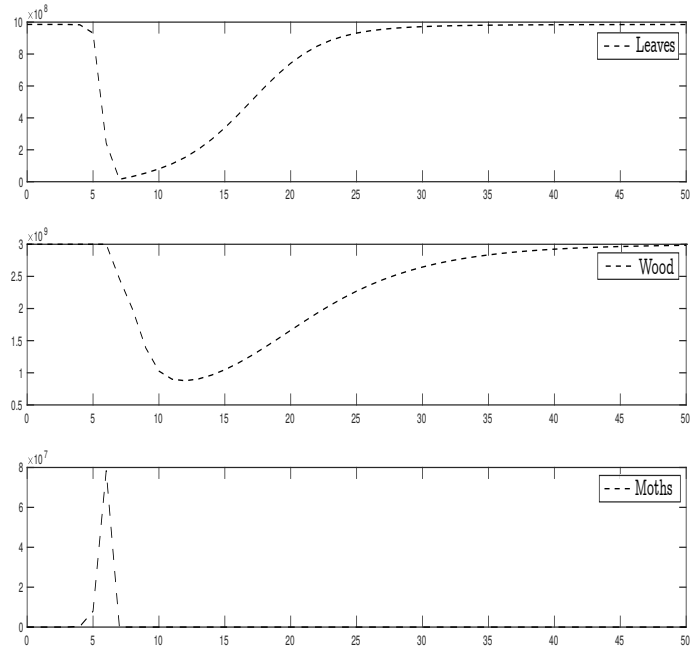

Figure 3

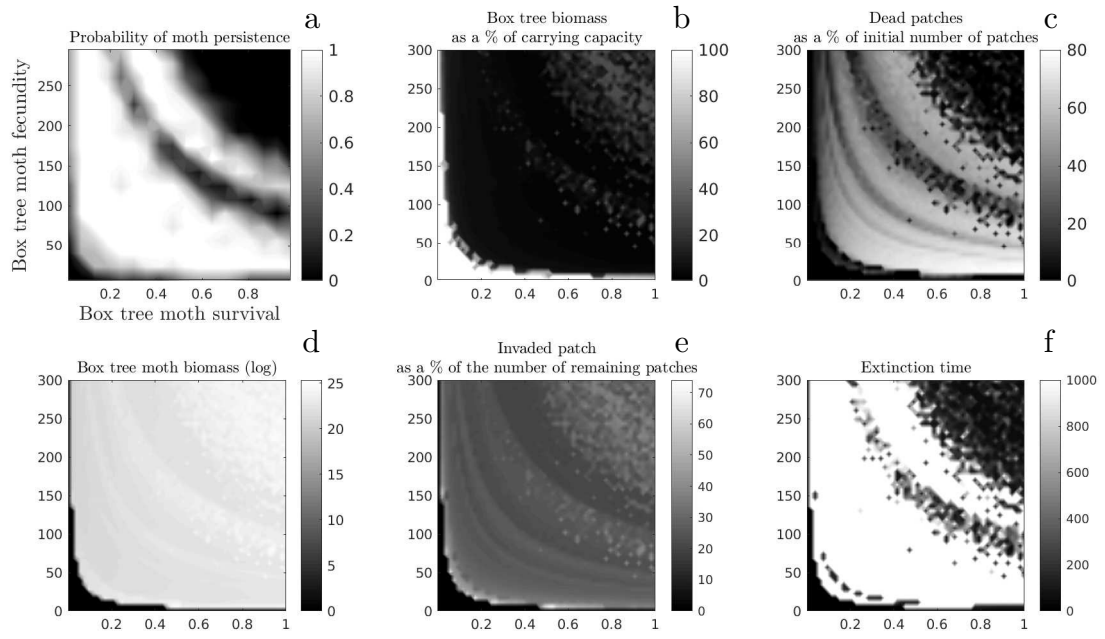

Figure 4

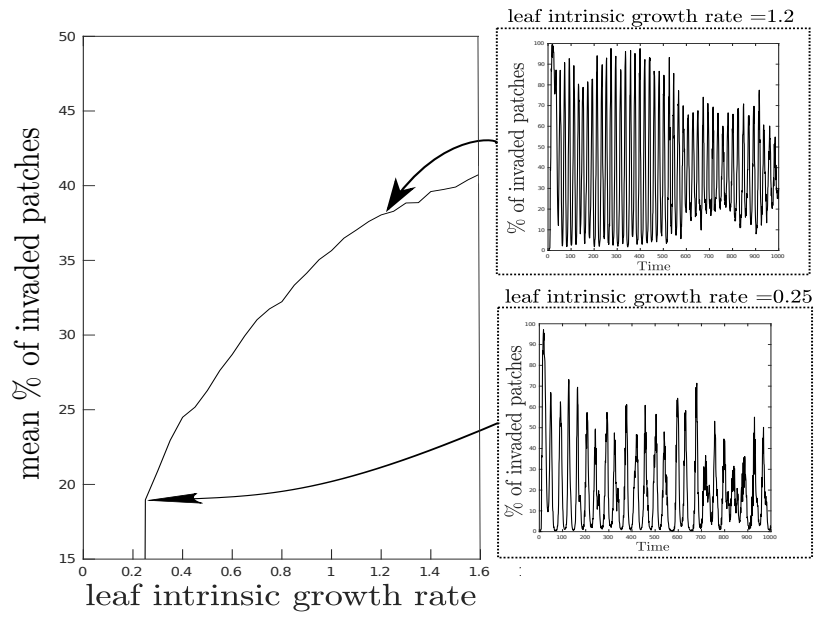

Figure 5

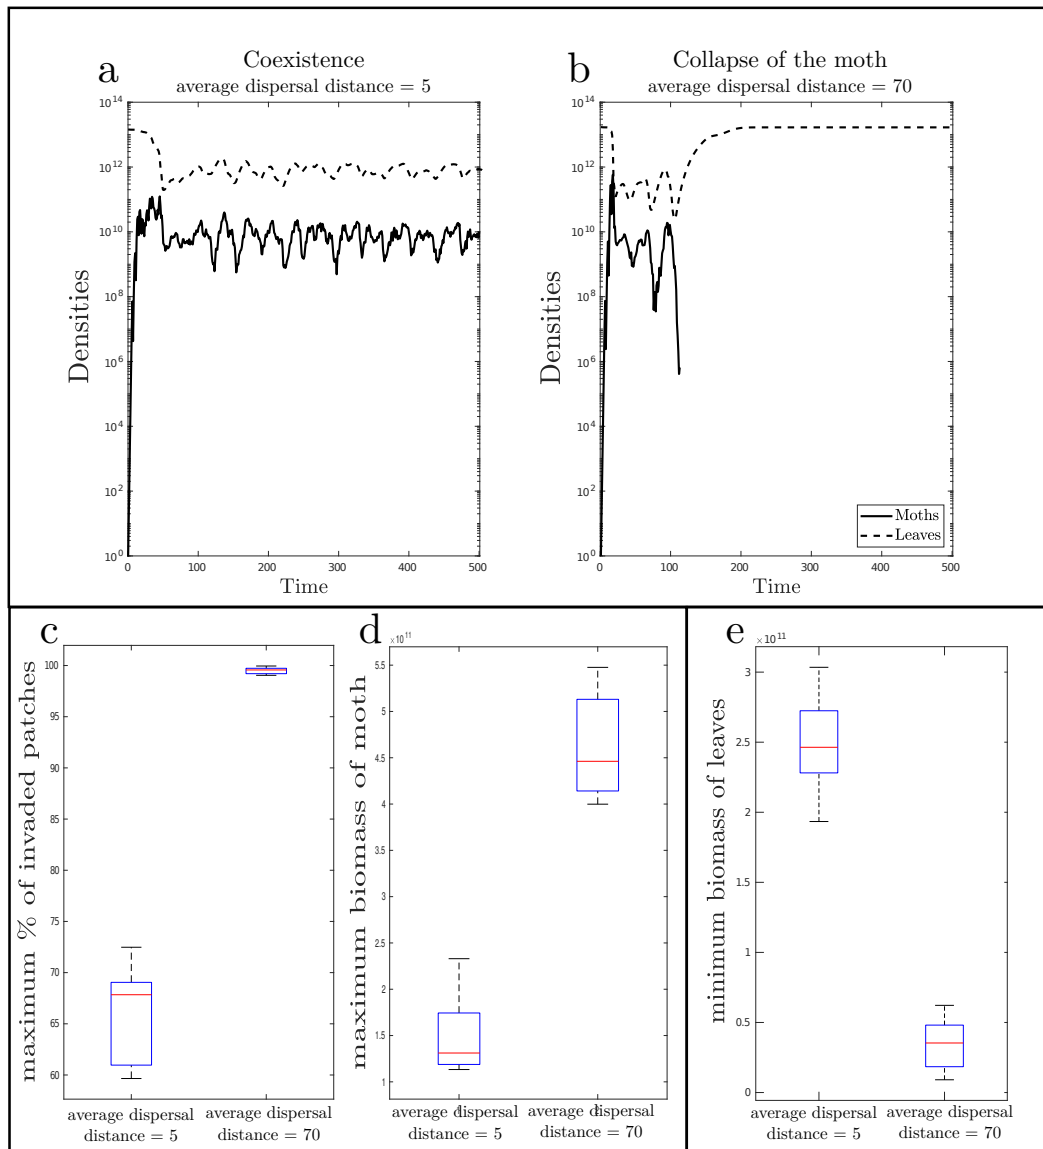

Figure 6

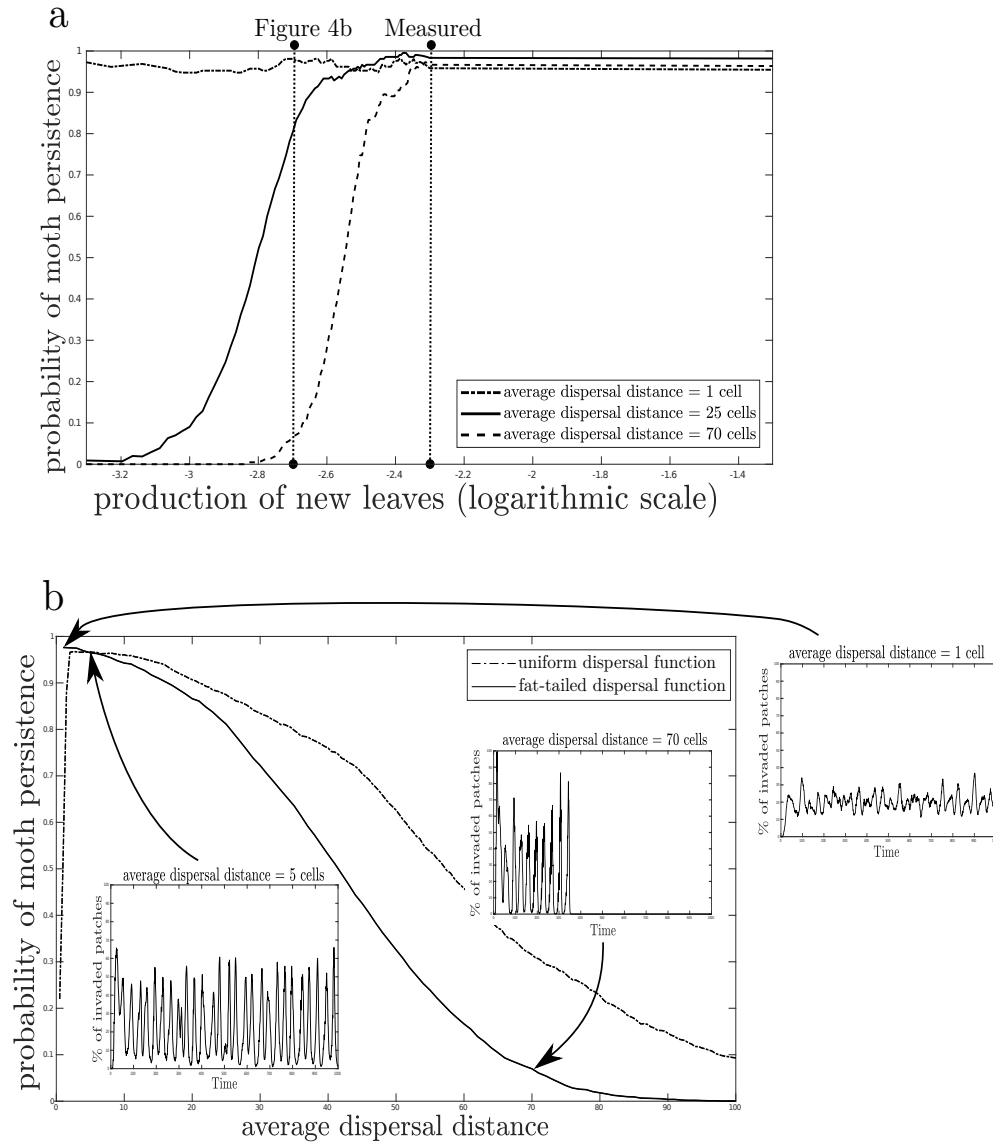

Figure 7

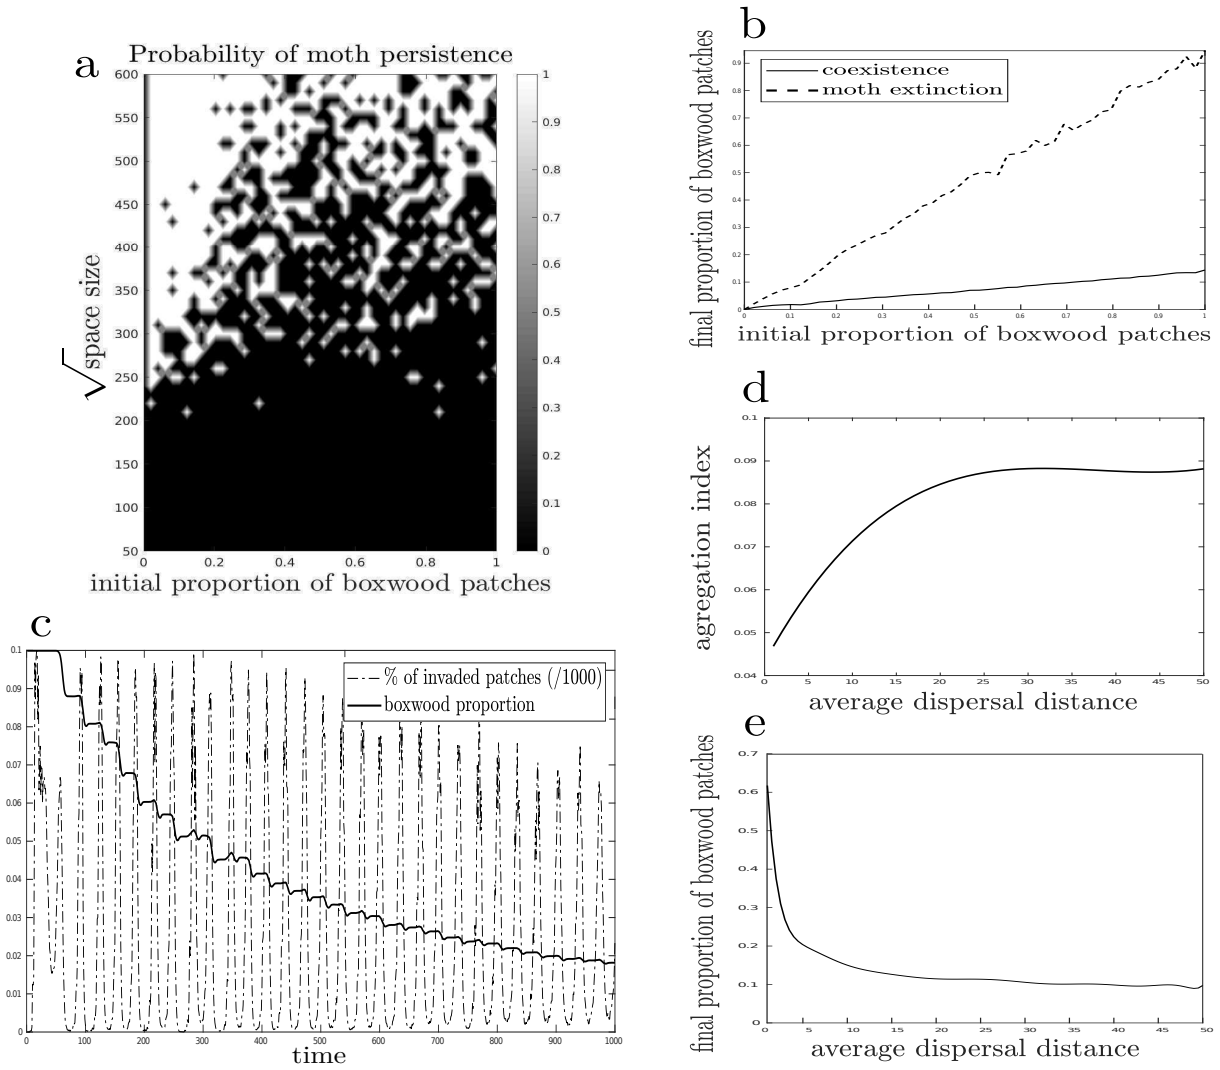

Figure 8

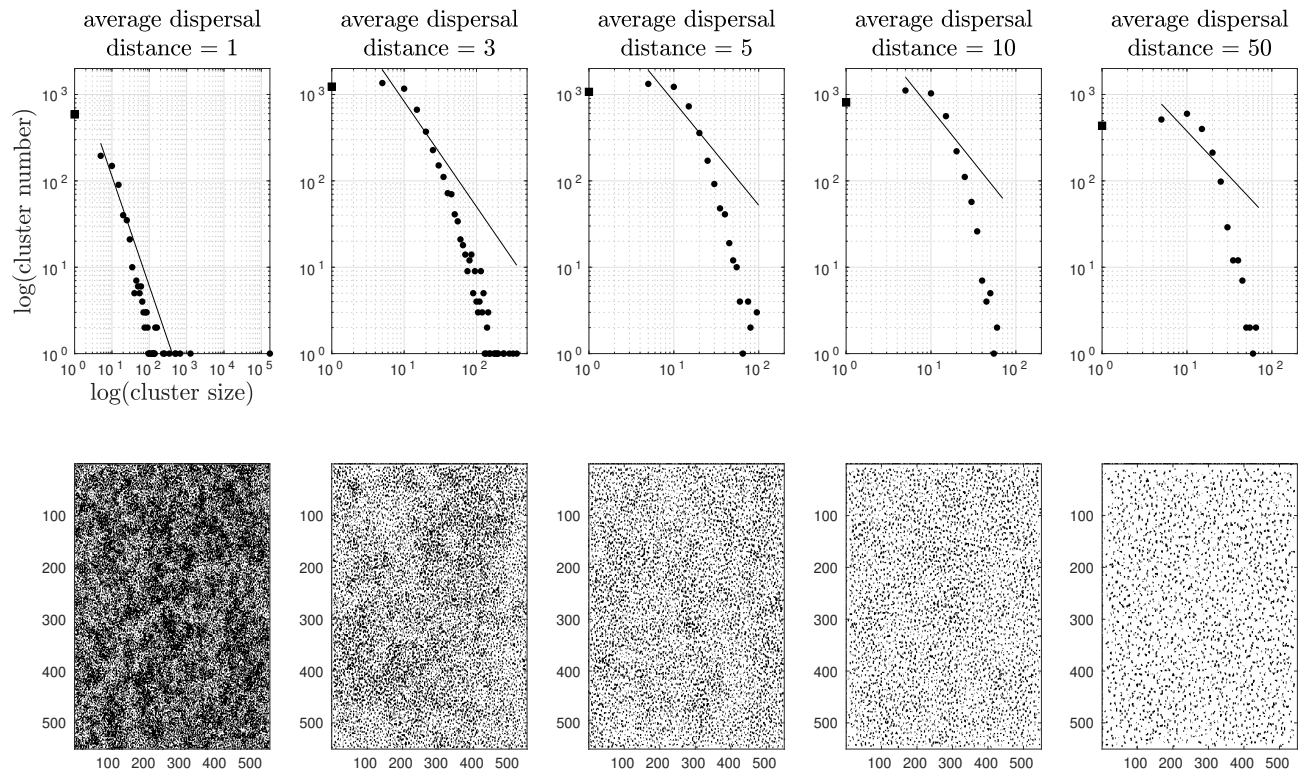

Figure 9
